# Supplementary material
Source: PubMed Central journal article supplement (PMC4733388)
Supplement: NIHMS741646-supplement-Supplemental_Material.pdf [file NIHMS741646-supplement-Supplemental_Material.pdf]

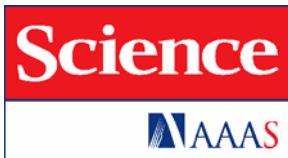

## Supplementary Materials for

### **Controlling low rates of cell differentiation through noise and ultrahigh feedback**

Robert Ahrends, Asuka Ota, Kyle M. Kovary, Takamasa Kudo, Byung Ouk Park, Mary N. Teruel\*

\*Corresponding author. E-mail: mteruel@stanford.edu

Published 20 June 2014, *Science* **344**, 1384 (2014)  
DOI: 10.1126/science.1252079

**This PDF file includes:**

Materials and Methods  
Supplementary Text  
Figs. S1 to S14  
Tables S1 to S3  
References

# Controlling low rates of terminal cell differentiation through noise and ultra-high feedback in the signaling system

## Supplementary information

### Materials and Methods

#### LC-MS setups

A Proxeon nanospray ionization source was used as an interface between an EASY-nLC Nano-HPLC system (Proxeon, Odense, Denmark) and a TSQ Vantage triple quadrupole MS system (Thermo Fisher Scientific, Bremen, Germany). The peptide separation was carried out using a 25 mm x 0.1 mm C18 trapping column (MICHROM C18, 5  $\mu\text{m}$ , 120  $\text{\AA}$ ) and a 200mm x 0.075 mm diameter reverse-phase C18 capillary column (Maisch C18, 3 $\mu\text{m}$ , 120  $\text{\AA}$ ). Peptides (up to 4 $\mu\text{g}$  of total protein digest) were separated with a linear gradient from 0% to 45% acetonitrile in 70 min, at a flow rate of 300 nl/min. For MS experiments, the following mode and tuning parameters were used: Polarity: positive, for scheduled SRM a maximum window of 5 min, a cycle time of 1s and an average dwell time of 26 ms was used for scheduled analysis, Q1 and Q3 were set to 0.70 u (FWHM), emitter voltage was set to 1500 V and the temperature of the transfer capillary to 270°C.

For all MS runs, standard LC/ESI SRM analysis were performed regularly using a digested six *Bos taurus* protein standard mixture (MICHROM, USA) to ensure best possible instrument performance.

## **Sample Preparation for Mass Spectrometry Analysis**

In order to be able to measure small changes in protein concentration between different samples, great pains were taken to make the sample preparations as consistent and reproducible as possible. Cells were pelleted by a low-speed spin, washed one time with PBS followed by a low-speed spin and aspiration, and frozen in liquid nitrogen. To extract proteins, the frozen pellet was first thawed on ice and then resuspended in 100  $\mu$ l per million cells of ice-cold lysis buffer consisting of 10 mM Hepes (pH 7.9), 1.5 mM  $MgCl_2$ , 10 mM KCl, 1 mM DTT, 0.01% digitonin, 1 mM PMSF, and a complete protease inhibitor cocktail (Roche, Mannheim, Germany). Cells were broken open by triturating 3 times through a 25-gauge needle and syringe and 3 times through a 30-gauge needle and syringe. The cell lysate was centrifuged at 2,300g for 10 min to pellet the nuclei, the supernatant represents the cytosolic and membrane fraction. Nuclei were washed by resuspending in 30  $\mu$ l per million cells of digitonin-free lysis buffer, spinning at 2,300g for 10 min at 4°C, and discarding the supernatant. Nuclear pellets were resuspended in a high salt buffer consisting of 20mM Hepes (pH 7.9), 25% v/v glycerol, 450 mM KCl, 1.5 mM  $MgCl_2$ , 0.2mM EDTA, 1mM DTT, 1 mM PMSF, and a complete protease inhibitor cocktail to extract the soluble nuclear protein fraction. Samples were placed on ice for 15 minutes followed by gentle shaking every 5 minutes for 15 minutes before centrifuging at 16,100 g for 10 minutes to pellet out the histones, which were dissolved in 8M urea for further use. The nuclear proteins in the supernatant were precipitated by adding 3 sample volumes of ice-cold acetone, storing overnight at -20°C, and then centrifuging at 16,100g to pellet the precipitated nuclear proteins. To obtain the cytosolic fraction the membranes were pelleted at 70,000 rpm (Beckmann Optima XL) and the supernatant subjected to acetone precipitated as described before the efficiency of the fractionation protocol is displayed in Fig. S4.

The pellets (nucleus, cytosolic, histone) were dissolved in 8M urea, and then the 8M urea solution was diluted down to 2M urea with 50 mM ammonium bicarbonate to enable the use of a BCA kit (Thermo Fischer Scientific, USA) to measure the concentration of the proteins in each sample. The BCA readings were used to measure the total protein concentration of each sample in order to make the subsequent addition of heavy peptides and trypsin as accurate as possible. The disulfide bonds of the proteins were reduced by incubation with tris(2-carboxyethyl)phosphine (TCEP) at a final concentration of 10 mM for 30 minutes at 37 °C. The produced free thiol groups were alkylated with 15 mM iodoacetamide (Sigma Aldrich, USA) at room temperature for 30 minutes in the dark before the samples were diluted to 1M urea with 50 mM ammonium bicarbonate. The heavy peptide mix was prepared as described below, and a protein amount based volume of 1  $\mu$ l (130 femtomol/ 1  $\mu$ g protein) was added to each sample. Sequencing-grade modified trypsin (Promega, Cat #V5113) was added at a ratio of 1  $\mu$ g per 100  $\mu$ g of protein, and the proteins were digested overnight at 37°C. The peptides were acidified to pH 2-3 with formic acid, desalted on a C18 Sep-Pak cartridge (Waters, Milford, MA, USA), and evaporated on a lyophilizer. The peptides were resolubilized in 2% acetonitrile with 0.1% formic acid. The concentration of peptides in each sample was read out at 230 nm using a Nanodrop (Thermo Fischer Scientific, USA) to ensure that the same amount of sample is injected for separation and SRM analysis.

### **Peptide and SRM Transition Selection**

The workflow for developing SRM assays is shown in Fig. S3. Proteotypic peptides and transitions (precursor/fragment ions) were selected primarily by screening through the entire sequence of the target protein using unscheduled LC/ESI SRM analysis with the following SRM

setup: a scan width of 0.002 m/z was used and a scan time 0.02 s was applied, Q1 and Q3 were set to 0.70 FWHM and the collision gas pressure was of 1.5 Torr. After a set of high quality transitions were found for a peptide (more than 4 transitions that each had a S/N > 3), the set was validated by using a heavy-labeled synthetic version of each peptide. The heavy peptides were obtained from JPT Peptides (Berlin, Germany) and were isotopically-labeled, ensuring that they co-eluted exactly with the endogenous peptides and the peak areas could be directly ratioed. In each peptide the C-terminal amino acid K or R residue was substituted with the corresponding heavy version resulting in a mass shift of +8 Da or +10 Da, respectively. The heavy internal standard peptides were tested to confirm that their light background showed no or almost no contaminating background (less than 1:10000, Fig. S5).

If the endogenous and the heavy-labeled internal standard peptides showed the same retention time and fragment ion intensity distribution during collision induced fragmentation, the endogenous peptides was used as protein probe. Finally we chose between two (high abundant proteins) to seven (for low abundant protein) transitions with the best signal/noise ratio and optimized the collision energy for best sensitivity (Fig. S6). The validated and optimized SRM transitions were used to detect and/or quantify the proteins in nuclei lysates using scheduled SRM mode. By restricting the acquisition of each transition to 2.5 minutes around its elution time, the time-scheduling feature of the acquisition software enabled the analysis of the 696 transitions in a single run per sample with high sensitivity. Table S2 shows the list of targeted peptides and transitions. To further validate the found peptide probes for proteins which had a regulatory effect on PPAR $\gamma$  or vice versa, an siRNA knockdown experiment was performed (Fig. S7). For this purpose, the samples were collected during differentiation at the timepoint where the siRNA targeted protein was expressed maximally during normal differentiation. The

samples were then analyzed by SRM mass spectrometry and compared to a YFP siRNA treated control.

### **SRM-based quantification**

For quantitative analysis, a heavy, isotopically-labeled synthetic version of each peptide of interest was custom ordered from JPT Peptides (Berlin, Germany). The heavy peptides were solubilized in 50  $\mu$ l of a 20% ACN, 50 mM ammonium bicarbonate solution and combined to a final concentration of 1.6  $\mu$ M. The peptide transitions in heavy and light versions were measured using scheduled SRM. SRM traces were analyzed using Skyline version 2.0 software (Maccoss lab, U. Washington). Peak areas for the transitions associated with the heavy and light peptides were quantified by ratioing light and heavy peptide areas. Furthermore the potential contamination of the heavy peptide preparations with the corresponding unlabeled peptides was investigated by injecting the heavy peptides alone (1 pmol) and monitoring the transitions for both the heavy and light peptide forms. At the concentration used for quantitative measurements no signal heavy signal was detectable in the ‘‘light’’ transitions (Fig. S5). In order to detect unexpected dramatic sample losses occurring during sample preparation several standard proteins were monitored during time course of adipogenesis, the different siRNA and chemical perturbations experiments. The following proteins HNRNPAB, HNRNPA2B1, CSTF3, SFRS1, SF3B3 and CREB1 were used as controls to ensure that no major sample loss in one of the biological replicates occurred or the whole experiment was affected by external factors. Samples which showed major discrepancies in-between the biological replicates and/or measuring points were excluded. The results were calculated by ratioing the areas between the light and heavy peptides. For every data point, 3 independent biological samples were analyzed and the error was

calculated as the standard deviation of the mean. All timepoint SRM data were normalized to day 0. All data obtained from the rosiglitazone titration experiment were normalized to the highest concentration point if they were rising and to the lowest drug concentration if they were dropping during rosiglitazone titration.

### **Cell culture and differentiation**

OP9 cells were cultured according to the protocols in Wollins et al. (23). OP9 cells were cultured in growth media consisting of MEM- $\alpha$  (GIBCO, # 12561-056), 100 units/mL Penicillin, 100 $\mu$ g/mL Streptomycin, and 292  $\mu$ g/mL L-glutamate (Gibco, # 10378-016). To differentiate, 5 million OP9 cells were plated in T75 flasks in growth media plus 20% FBS. The following day, the media on the cells was replaced with growth media plus 10% FBS, 0.517 mM IBMX (Sigma Aldrich, USA), and 62 nM dexamethasone (Sigma Aldrich, USA) (Stimulus I). After two days, Stimulus I was removed from the cells and was replaced with Stimulus II consisting of growth media plus 10% FBS and 172 nM insulin (Sigma Aldrich, USA) for two more days (Fig. S9).

### **Immunofluorescence Staining**

OP9 cells were fixed with 3% paraformaldehyde in PBS for 30 min. Then the cells were gently washed 3X with PBS and permeabilized with 0.05% saponin (Sigma #47036), blocked with 3% bovine serum albumin (Sigma #7906) and stained with DAPI (1:10000), anti-PPARG (1:500 Santa Cruz Biotech #sc-7273), anti-CEBPA (1:500, Santa Cruz Biotech #sc-61), anti-CEBPB (1:500, Santa Cruz Biotech #sc-150), anti-CEBPA (1:500, Santa Cruz Biotech #sc-7962) or BODIPY 493/503, (1 $\mu$ g/ml, Molecular Probes #D-3922). Alexa Fluor-514 (#A31558), 555

(#A21429), 594 (#A11032) and 647 (#A31571) (1:1000, Invitrogen) were used as secondary antibodies (Fig. S9).

### **Drug treatments**

For the drug treatments the same media and conditions were used as described before with the following exceptions: A quarter of Stimulus I was used with either 10  $\mu$ M rosiglitazone (Cayman, USA) or 0.5  $\mu$ M CHIR-99021 (Cayman, USA). For the rosiglitazone titration no IBMX, dexamethasone or insulin was used. Rosiglitazone was titrated from 0 to 0.5  $\mu$ M, and the cells were pelleted after 48 hours. The rosiglitazone time course experiment was carried out with 10  $\mu$ M rosiglitazone in 10% FBS MEM-alpha and the cells were pelleted after 0, 1.5, 3, 6, 12, 24, 36, 48, 72 and 96 hours of differentiation. All experiments were performed in triplicates.

### **siRNA preparation and transfection**

Diced pool siRNA was generated as described previously (7, 30). Gene-specific primers were designed with an in-house primer program and were used to generate ~600 bp cDNA fragments immediately upstream of the stop codon of each mRNA by PCR. An additional set of nested primers were designed to add T7 promoters at both ends of the final cDNA fragment. Table S3 shows a list of all primers used to make the siRNA. Nested PCR products were subjected to *in vitro* transcription, *in vitro* dicing, and purification to produce siRNA. OP9 cells were transfected with siRNA by a reverse transfection protocol. For each 96-well well, 2 pmol of diced-pool siRNA were diluted in 10 $\mu$ l of Opti-Mem I Medium. 0.2 $\mu$ l of RNAiMax (Invitrogen) diluted in 10 $\mu$ l of Opti-Mem I was then added, mixed well, and then incubated for 10 minutes at room temperature. This mixture was then placed into a 96-well, and OP9 cells were added



(15,000 cells suspended in 80  $\mu$ l of growth medium without antibiotics). After 24 hours, the media was replaced with differentiation media to induce differentiation. For the siRNA experiments in T75 flasks the experiments were up scaled by the factor of 200 and carried out as described above. The knockdown efficiency for proteins found in feedback was further validated by SRM analysis (Fig. S7).

### **Automated image acquisition and processing**

Images were acquired on an ImageXpress 5000A automated epifluorescence microscope (Molecular Devices; Sunnyvale, CA, USA) using a 4X Plan Fluor objective and a 1280  $\times$  1024 pixel, cooled CCD camera with a 12-bit readout. Image analysis was performed using custom software written in Matlab. In brief, nuclear centroids were identified in images of Hoechst stain. A nucleus mask was generated for each cell by expansion from the centroid to reach 30% off maximum intensity. A cell mask was then generated by expansion of the nucleus mask 7  $\mu$ m to include both the nucleus and the perinuclear region. After local background subtraction, the nucleus mask was used to measure PPARG, C/EBPB mean intensities, and the cell mask was used to measure BODIPY (lipid droplet content).

### **Defining differentiation**

We have previously shown that the transition from a proliferating preadipocyte precursor cell into a mature, non-proliferating adipocyte capable of accumulating lipid occurs via a bistable switch from low PPARG expression in the cell to high PPARG expression (7). As shown in Fig. 1A, a histogram of PPARG expression for a population of differentiating adipocytes shows two peaks of PPARG expression - low and high. The high state predicts the subsequent lipid droplet

formation. We thus define a cell as being differentiated if its level of PPARG placed the cell in the high PPARG-expressing peak of the cell population.

## Calculating overall cooperativity of the system

Model 2 in Fig.2 depicts a system with 6 positive feedback loops, each with a cooperativity of 2 (Model 2 in Fig. 2). If the 6 feedback loops are working as AND-gates, their contributions should be multiplied together, and the system can be described with the following equations:

$$\frac{dX_0}{dt} = \varepsilon_0 * R * \left( 1 + \alpha * \frac{X_1^2 * X_2^2 * X_3^2 * X_4^2 * X_5^2 * X_6^2}{1 + X_1^2 * X_2^2 * X_3^2 * X_4^2 * X_5^2 * X_6^2} \right) - X_0 \quad (1)$$

$$\frac{dX_j}{dt} = \varepsilon_j * X_0 - X_j \quad \text{where } j = 1, \dots, 6 \quad (2)$$

In the steady-state, eqn (2) becomes:

$$X_1 = \varepsilon_1 * X_0$$

⋮

$$X_6 = \varepsilon_6 * X_0$$

Plugging into eqn (1):

$$0 = \varepsilon_0 * R * \left( 1 + \alpha * \frac{\varepsilon_1 X_0^2 * \varepsilon_2 X_0^2 * \varepsilon_3 X_0^2 * \varepsilon_4 X_0^2 * \varepsilon_5 X_0^2 * \varepsilon_6 X_0^2}{1 + \varepsilon_1 X_0^2 * \varepsilon_2 X_0^2 * \varepsilon_3 X_0^2 * \varepsilon_4 X_0^2 * \varepsilon_5 X_0^2 * \varepsilon_6 X_0^2} \right) - X_0$$

$$0 = \varepsilon_0 * R * \left( 1 + \alpha * \frac{(\varepsilon_1 \varepsilon_2 \varepsilon_3 \varepsilon_4 \varepsilon_5 \varepsilon_6) * (X_0^2 X_0^2 X_0^2 X_0^2 X_0^2 X_0^2)}{1 + (\varepsilon_1 \varepsilon_2 \varepsilon_3 \varepsilon_4 \varepsilon_5 \varepsilon_6) * (X_0^2 X_0^2 X_0^2 X_0^2 X_0^2 X_0^2)} \right) - X_0$$

$$0 = \varepsilon_0 * R * \left( 1 + \alpha * \frac{(\varepsilon_1 \varepsilon_2 \varepsilon_3 \varepsilon_4 \varepsilon_5 \varepsilon_6) * X_0^{12}}{1 + (\varepsilon_1 \varepsilon_2 \varepsilon_3 \varepsilon_4 \varepsilon_5 \varepsilon_6) * X_0^{12}} \right) - X_0$$

Thus, this system has a cooperativity of n=12.

If feedback loops are in an OR-gate configuration, the feedback loop contributions could replace each other, and in this case we would add the contributions. For example, if feedback loops to proteins X1 through X4 served as AND-gates and X5 and X6 were OR-gates, the equations would be as follows:

$$\frac{dX_0}{dt} = \varepsilon_0 * R * \left( 1 + \alpha * \frac{X_1^2 * X_2^2 * X_3^2 * X_4^2 + X_5^2 + X_6^2}{1 + X_1^2 * X_2^2 * X_3^2 * X_4^2 + X_5^2 + X_6^2} \right) - X_0 \quad (3)$$

$$\frac{dX_j}{dt} = \varepsilon_j * X_0 - X_j \quad \text{where } j = 1, \dots, 6 \quad (4)$$

We initially assumed that the network topology included AND-gates because we had already identified two such AND-gates (CEBPA and CEBPB) in the network in a previous study by showing that knocking these proteins down individually with siRNA indeed killed the entire network response (7).

In the current study, we confirmed experimentally for at least four of the positive feedback loops - CEBPA, CEBPB, FABP4, and LPIN1- that they must be configured during adipogenesis as AND-gates. siRNA-mediated depletion of each of these feedback loop proteins individually results in a near complete lack of adipogenesis in most cells (enrichment of cells in the low PPARG abundance peak as marked by the solid lines, top two plots on left, Fig. 4C). In addition, CEBPA and FABP4 are connected to the network as AND-gates during de-differentiation as demonstrated by the fact that siRNA-mediated depletion of these feedback loop proteins individually under de-differentiation conditions results in a near complete loss of PPARG expression in many cells (solid lines, top right plot, Fig. 4C).

In the current study, we identified 4 positive-loops in an AND-gate configuration based on this criterion. A more complete knockdown in expression than is attainable by siRNA may show that the other 3 loops identified in this study may also have at least a partial AND-configuration.

The specific connection mechanism by each of the different feedback loops is likely not the same and may include different cooperativities, time constants, as well as mixtures of additive (OR-gate) and multiplicative (AND-gate) features. Since the precise wiring structure of a complex network is difficult to dissect, we are simplifying the likely mixture of AND and OR features by defining a feedback loop protein as being connected as an AND-gate if the protein is required for adipogenesis (the knockdown kills differentiation). In general, increasing the relative fraction of additive (OR-gate) regulatory feedback loops (compared to multiplicative AND-gate loops) confers less of a benefit for balancing low differentiation rates and keeping the system in the locked differentiated state.

The individual feedbacks may also vary in their half-maximal response values; in other words, each feedback loop may kick 'on' at a different threshold concentration of its respective transcription factor, which would confound the simple additivity of the Hill coefficients and the overall response.

### Calculation of errors (for more details, see (31))

The uncertainty in a sum  $q = x + y$  or a product  $q = x * y$  is:  $\delta q = \delta x + \delta y$

If  $q = x^n$ , the uncertainty then is:  $\Delta q \sim |n| * \Delta x$

However, when the uncertainties in a sum  $q = x + y$  or a product  $q = x * y$  are independent and random, the uncertainties are added in quadrature:  $\Delta q \sim \sqrt{\Delta x^2 + \Delta y^2}$

The equations for a one feedback loop system with a cooperativity of 12 (Model 1 in Fig. 2) are:

$$\frac{dX_0}{dt} = \varepsilon_0 * R * \left( 1 + \alpha * \frac{X_1^{12}}{1 + X_1^{12}} \right) - X_0$$

$$\frac{dX_1}{dt} = \varepsilon_1 * X_0 - X_1$$

where  $\varepsilon_0 \cong \varepsilon_1 \cong 30\%$  log normal noise

The feedback amplification,  $\alpha = 15$ , reflects the increase in PPARG expression measured experimentally in (7).

In the undifferentiated, basal state where the feedback-induced noise is low:

$$\frac{dX_0}{dt} = \varepsilon_0 * R_0$$

In the transition region where the feedback loops are fully engaged and the feedback-induced noise dominates:

$$\frac{dX_0}{dt} = \varepsilon_0 * R * \alpha * X_1^{12} \sim \varepsilon_0 * R * \alpha * \varepsilon_1^{12} X_0^{12}$$

$$\sim \sqrt{\varepsilon_0^2 + (\varepsilon_1^{12})^2} \text{ since } \varepsilon_0 \text{ and } \varepsilon_1 \text{ are independent}$$

The error is then  $\sim \varepsilon_1^{12} \sim \varepsilon_0^{12} \sim 12 * \varepsilon_0$

The equations for a six feedback loop system with a total cooperativity of 12 in which each loop has a cooperativity of 2 (Model 2 in Fig. 2) are:

$$\frac{dX_0}{dt} = \varepsilon_0 * R * \left( 1 + \alpha * \frac{X_1^2 * X_2^2 * X_3^2 * X_4^2 * X_5^2 * X_6^2}{1 + X_1^2 * X_2^2 * X_3^2 * X_4^2 * X_5^2 * X_6^2} \right) - X_0$$

$$\frac{dX_j}{dt} = \varepsilon_j * X_0 - X_j \quad \text{where } j=1, \dots, 6$$

In the undifferentiated, basal state where the feedback-induced noise is low:

$$\frac{dX_0}{dt} \sim \varepsilon_0 * R_0$$

In the transition region where the feedback loops are fully engaged and the feedback-induced noise dominates:

$$\begin{aligned} \frac{dX_0}{dt} &\sim \varepsilon_0 * R * \alpha * X_1^2 * X_2^2 * X_3^2 * X_4^2 * X_5^2 * X_6^2 \\ &\sim \varepsilon_0 * R * \alpha * \varepsilon_1^2 X_0^2 * \varepsilon_2^2 X_0^2 * \varepsilon_3^2 X_0^2 * \varepsilon_4^2 X_0^2 * \varepsilon_5^2 X_0^2 * \varepsilon_6^2 X_0^2 \end{aligned}$$

Assuming that  $\varepsilon_0 \sim \varepsilon_n \sim 30\%$  log normal noise ,

$$\begin{aligned} \text{the error would be } &\sim \sqrt{\varepsilon_0^2 + (2 * \varepsilon_1)^2 + (2 * \varepsilon_2)^2 + (2 * \varepsilon_3)^2 + (2 * \varepsilon_4)^2 + (2 * \varepsilon_5)^2 + (2 * \varepsilon_6)^2} \\ &\sim \sqrt{\varepsilon_0^2 + (2 * \varepsilon_0)^2 + (2 * \varepsilon_0)^2} \\ &\sim \sqrt{\varepsilon_0^2 + 6 * 4 * \varepsilon_0^2} \quad \text{since the errors are all independent} \\ &\sim 4.9 * \varepsilon_0 \end{aligned}$$

The noise is likely bigger in the synthesis versus degradation rates of the proteins in the system since mRNA copy number is believed to be the significant source of noise in mammalian cells (16). Thus, in the current simulations, all error terms were added to the protein synthesis rates. However, mathematically the results should be similar if noise is attributed to both protein synthesis and degradation rates. In practice, noise is added to each simulation by calculating a normally-distributed random variable that is then converted to a log scale and multiplied with the synthesis rate to give a relative error.

### **Calculation of differentiation rate:**

~10% of adipocytes are turned over every year in human adults (6)

---

If it takes ~ 4 days for adipocytes to differentiate from preadipocytes (3):

365 days per year/ 4 days to differentiate ~ 91.25 time periods during the year in which to differentiate

With a 10% yearly turnover divided by 91.25 time periods per year in which to differentiate ~0.1% of adipocytes are differentiating at any given time. Thus humans cannot lose more than ~0.1% of their adipocytes if they want to maintain their current fat mass.

Since there are ~5 adipocytes to 1 preadipocyte (2), ~0.5% of preadipocytes (or 1 preadipocyte out of 200) must be differentiating at any given time.

---

If it takes ~ 12 days for adipocytes to differentiate from preadipocytes:

365 days per year/ 12 days to differentiate ~ 30.4 time periods during the year in which to differentiate

With a 10% yearly turnover divided by 30.4 time periods per year in which to differentiate ~0.33% of adipocytes are differentiating at any given time. Thus humans cannot lose more than ~0.33% of their adipocytes if they want to maintain their current fat mass.

Since there are ~5 adipocytes to 1 preadipocyte (2), ~1.65% of preadipocytes (or 1 preadipocyte out of 60) must be differentiating at any given time

---

Thus, if it takes between 4-12 days for a preadipocyte to differentiate into an adipocyte, between 0.5-1.65 % of preadipocytes must be differentiating at any given time.

**Table S1: List of monitored proteins.**

| <b>No</b> | <b>Protein</b> | <b>NP</b>       | <b>Description</b>                                                                                |
|-----------|----------------|-----------------|---------------------------------------------------------------------------------------------------|
| 1         | NFIL3          | NP_059069.1     | Nuclear factor interleukin-3-regulated protein                                                    |
| 2         | FOXK1          | NP_951031.2.    | Forkhead box protein K1                                                                           |
| 3         | CREB1          | NP_598589.2.    | Cyclic AMP-responsive element-binding protein 1                                                   |
| 4         | SIRT2          | NP_001116237.1. | NAD-dependent deacetylase sirtuin-2                                                               |
| 5         | SCMARCA5       | NP_444354.2     | SWI/SNF related, matrix associated, actin dependent regulator of chromatin, subfamily a, member 3 |
| 6         | SMARCA4        | NP_035547.1     | SWI/SNF related, matrix associated, actin dependent regulator of chromatin, subfamily a, member 4 |
| 7         | SMARCC1        | NP_033237.2     | SWI/SNF related, matrix associated, actin dependent regulator of chromatin, subfamily c, member 1 |
| 8         | SMARCC2        | NP_444354.2.    | SWI/SNF-related matrix-associated actin-dependent regulator of chromatin subfamily A member 5     |
| 9         | SMARCE1        | NP_065643.1.    | SWI/SNF-related matrix-associated actin-dependent regulator chromatin subfamily E member 1        |
| 10        | SMARCD2        | NP_001123659.1  | SWI/SNF related, matrix associated, actin dependent regulator of chromatin, subfamily d, member 2 |
| 11        | MGMT           | NP_032624.1.    | Methylated-DNA--protein-cysteine methyltransferase                                                |
| 12        | BRD8           | NP_084423.2.    | Bromodomain-containing protein 8                                                                  |
| 13        | TRIM28         | NP_035718.2.    | Transcription intermediary factor 1-beta                                                          |
| 14        | WDR5           | NP_543124.1.    | WD repeat-containing protein 5                                                                    |
| 15        | MYBBP1a        | NP_058056.2     | myb-binding protein                                                                               |
| 16        | PPARG          | NP_001120802.1. | peroxisome proliferator-activated receptor gamma                                                  |
| 17        | CEBPA          | NP_031704.2     | CCAAT/enhancer-binding protein alpha                                                              |
| 18        | CEEBPB         | NP_034013.1     | CCAAT/enhancer-binding protein beta                                                               |
| 19        | CEBPZ          | NP_001019977.1  | CCAAT/enhancer-binding protein zeta                                                               |
| 20        | EEF1A1         | NP_034236.2.    | Elongation factor 1-alpha 1                                                                       |
| 21        | FABP4          | NP_077717.1.    | Fatty acid-binding protein, adipocyte                                                             |
| 22        | FLNA           | NP_034357.2     | Alpha-filamin Endothelial actin-binding protein                                                   |
| 23        | FOXC2          | NP_038547.2.    | Forkhead box protein C2                                                                           |
| 24        | APEX1          | NP_033817.1.    | DNA-(apurinic or apyrimidinic site) lyase                                                         |
| 25        | CSTF3          | NP_663504.1.    | Cleavage stimulation factor subunit 3                                                             |
| 26        | SF3B3          | NP_598714.1.    | Pre-mRNA-splicing factor SF3b                                                                     |
| 27        | NONO           | NP_075633       | Non-POU domain-containing octamer-binding protein                                                 |
| 28        | HNRNPA2b1      | NP_058086.2.    | Heterogeneous nuclear ribonucleoproteins A2/B1                                                    |
| 29        | SFRS1          | NP_001071635.1. | Serine/arginine-rich splicing factor 1                                                            |
| 30        | HNRNPAB        | NP_034578.1.    | Heterogeneous nuclear ribonucleoprotein A/B                                                       |
| 31        | POLR2H         | NP_663607.1.    | DNA-directed RNA polymerases I, II, and III subunit RPABC3                                        |
| 32        | UBAP2L         | NP_001159455.1. | Ubiquitin-associated protein 2-like                                                               |



|    |         |                 |                                                                           |
|----|---------|-----------------|---------------------------------------------------------------------------|
| 33 | NEDD4   | NP_035020.2.    | E3 ubiquitin-protein ligase NEDD4                                         |
| 34 | CSRP1   | NP_031817.1.    | Cysteine and glycine-rich protein 1                                       |
| 35 | PTBP1   | NP_001070831.1  | polypyrimidine tract binding protein                                      |
| 36 | ACTL6A  | NP_062647.2.    | Actin-related protein Baf53a                                              |
| 37 | BAZ1B   | NP_035844.2.    | Bromodomain adjacent to zinc finger domain protein 1B                     |
| 38 | BCLAF   | NP_001020563.1. | Bcl-2-associated transcription factor 1                                   |
| 39 | CAND1   | NP_082270.1.    | Cullin-associated NEDD8-dissociated protein 1                             |
| 40 | CTBP1   | NP_001185788.1. | C-terminal-binding protein 1                                              |
| 41 | CTBP2   | NP_001164215.1. | C-terminal-binding protein 2                                              |
| 42 | DCUN1   | NP_001192290.1. | Defective in cullin neddylation protein 1-like protein 1                  |
| 43 | MYH9    | NP_071855.2.    | Cellular myosin heavy chain, type A                                       |
| 44 | ELAVL1  | NP_034615.2.    | ELAV-like protein 1                                                       |
| 45 | GSK3B   | NP_062801.1.    | Glycogen synthase kinase-3 beta                                           |
| 46 | LMNA    | NP_001002011.2. | Lmna Isoform C2                                                           |
| 47 | NFKB1   | NP_032715.2.    | Nuclear factor NF-kappa-B p105 subunit                                    |
| 48 | NSUN2   | NP_663329.3.    | Myc-induced SUN domain-containing protein                                 |
| 49 | RCOR1   | NP_932140.1.    | REST corepressor 1                                                        |
| 50 | TAX1BP3 | NP_083840.1.    | Tax1-binding protein 3                                                    |
| 51 | ZFP326  | NP_061229.2.    | DBIRD complex subunit ZNF326                                              |
| 52 | AEBP1   | NP_033766.2.    | Adipocyte enhancer-binding protein 1                                      |
| 53 | AKAP8   | NP_062748.2.    | A-kinase anchor protein 8                                                 |
| 54 | CTNND1  | NP_001078917.1. | Catenin delta-1                                                           |
| 55 | EMERIN  | NP_031953.1.    | Stabilizes and promotes the formation of a nuclear actin cortical network |
| 56 | RAD50   | IPI00108335     | DNA repair protein RAD50                                                  |
| 57 | RUNX2   | NP_001139510.1. | Runt-related transcription factor 2                                       |
| 58 | RUVBL1  | NP_062659.1.    | 49 kDa TATA box-binding protein-interacting protein                       |
| 59 | LPIN1   | NP_001123884.1. | Fatty liver dystrophy protein                                             |
| 60 | RUVBL2  | NP_035434.1.    | RuvB-like 2                                                               |

**Table S2: Monitored peptide transitions.**

| <i>Protein</i> | <i>Peptide</i> | <i>Q1<br/>[m/z]</i> | <i>Q3<br/>[m/z]</i> | <i>CID<br/>[eV]</i> | <i>fragment<br/>ion</i> | <i>isotope</i> |
|----------------|----------------|---------------------|---------------------|---------------------|-------------------------|----------------|
| ACTL6A         | LIANNTTVER*    | 565.8               | 719.4               | 19.9                | y6                      | light          |
| ACTL6A         | LIANNTTVER*    | 565.8               | 605.3               | 19.9                | y5                      | light          |
| ACTL6A         | LIANNTTVER*    | 565.8               | 504.3               | 19.9                | y4                      | light          |
| ACTL6A         | LIANNTTVER*    | 570.8               | 729.4               | 19.9                | y6                      | heavy          |
| ACTL6A         | LIANNTTVER*    | 570.8               | 615.3               | 19.9                | y5                      | heavy          |
| ACTL6A         | LIANNTTVER*    | 570.8               | 514.3               | 19.9                | y4                      | heavy          |
| ACTL6A         | QGGPTYIIDTNALR | 784.9               | 965.5               | 26.5                | y8                      | light          |
| ACTL6A         | QGGPTYIIDTNALR | 784.9               | 802.4               | 26.5                | y7                      | light          |
| ACTL6A         | QGGPTYIIDTNALR | 784.9               | 689.4               | 26.5                | y6                      | light          |
| ACTL6A         | QGGPTYIIDTNALR | 789.9               | 975.5               | 26.5                | y8                      | heavy          |
| ACTL6A         | QGGPTYIIDTNALR | 789.9               | 812.5               | 26.5                | y7                      | heavy          |
| ACTL6A         | QGGPTYIIDTNALR | 789.9               | 699.4               | 26.5                | y6                      | heavy          |
| ACTL6A         | SPLAGDFITMQCR  | 748.4               | 1127.5              | 25.4                | y9                      | light          |
| ACTL6A         | SPLAGDFITMQCR  | 748.4               | 808.4               | 25.4                | y6                      | light          |
| ACTL6A         | SPLAGDFITMQCR  | 748.4               | 695.3               | 25.4                | y5                      | light          |
| ACTL6A         | SPLAGDFITMQCR  | 753.4               | 1137.5              | 25.4                | y9                      | heavy          |
| ACTL6A         | SPLAGDFITMQCR  | 753.4               | 818.4               | 25.4                | y6                      | heavy          |
| ACTL6A         | SPLAGDFITMQCR  | 753.4               | 705.3               | 25.4                | y5                      | heavy          |
| BAZ1B          | YQEITHSIYLAR*  | 747.4               | 960.5               | 25.3                | y8                      | light          |
| BAZ1B          | YQEITHSIYLAR*  | 747.4               | 859.5               | 25.3                | y7                      | light          |
| BAZ1B          | YQEITHSIYLAR*  | 747.4               | 722.4               | 25.3                | y6                      | light          |
| BAZ1B          | YQEITHSIYLAR*  | 752.4               | 970.5               | 25.3                | y8                      | heavy          |
| BAZ1B          | YQEITHSIYLAR*  | 752.4               | 869.5               | 25.3                | y7                      | heavy          |
| BAZ1B          | YQEITHSIYLAR*  | 752.4               | 732.4               | 25.3                | y6                      | heavy          |
| BAZ1B          | FSDFLDPYK      | 622.8               | 748.4               | 21.6                | y6                      | light          |
| BAZ1B          | FSDFLDPYK      | 622.8               | 635.3               | 21.6                | y5                      | light          |
| BAZ1B          | FSDFLDPYK      | 622.8               | 522.3               | 21.6                | y4                      | light          |
| BAZ1B          | FSDFLDPYK      | 626.8               | 756.4               | 21.6                | y6                      | heavy          |
| BAZ1B          | FSDFLDPYK      | 626.8               | 643.4               | 21.6                | y5                      | heavy          |
| BAZ1B          | FSDFLDPYK      | 626.8               | 530.3               | 21.6                | y4                      | heavy          |
| Bclaf1         | SPAVTLNER*     | 493.8               | 802.4               | 17.7                | y7                      | light          |
| Bclaf1         | SPAVTLNER*     | 493.8               | 731.4               | 17.7                | y6                      | light          |
| Bclaf1         | SPAVTLNER*     | 493.8               | 632.3               | 17.7                | y5                      | light          |
| Bclaf1         | SPAVTLNER*     | 498.8               | 812.5               | 17.7                | y7                      | heavy          |
| Bclaf1         | SPAVTLNER*     | 498.8               | 741.4               | 17.7                | y6                      | heavy          |
| Bclaf1         | SPAVTLNER*     | 498.8               | 642.3               | 17.7                | y5                      | heavy          |
| CAND1          | AVAALLTIPEAEK* | 663.4               | 900.5               | 22.8                | y8                      | light          |
| CAND1          | AVAALLTIPEAEK* | 663.4               | 787.4               | 22.8                | y7                      | light          |

|       |                 |       |       |      |    |       |
|-------|-----------------|-------|-------|------|----|-------|
| CAND1 | AVAALLTIPEAEK*  | 663.4 | 573.3 | 22.8 | y5 | light |
| CAND1 | AVAALLTIPEAEK*  | 667.4 | 908.5 | 22.8 | y8 | heavy |
| CAND1 | AVAALLTIPEAEK*  | 667.4 | 795.4 | 22.8 | y7 | heavy |
| CAND1 | AVAALLTIPEAEK*  | 667.4 | 581.3 | 22.8 | y5 | heavy |
| CAND1 | SVILEAFSSPSEEVK | 811.4 | 862.4 | 27.2 | y8 | light |
| CAND1 | SVILEAFSSPSEEVK | 811.4 | 775.4 | 27.2 | y7 | light |
| CAND1 | SVILEAFSSPSEEVK | 811.4 | 688.4 | 27.2 | y6 | light |
| CAND1 | SVILEAFSSPSEEVK | 815.4 | 870.4 | 27.2 | y8 | heavy |
| CAND1 | SVILEAFSSPSEEVK | 815.4 | 783.4 | 27.2 | y7 | heavy |
| CAND1 | SVILEAFSSPSEEVK | 815.4 | 696.4 | 27.2 | y6 | heavy |
| CTBP1 | IGSGFDNIDIK*    | 589.8 | 864.4 | 20.6 | y7 | light |
| CTBP1 | IGSGFDNIDIK*    | 589.8 | 717.4 | 20.6 | y6 | light |
| CTBP1 | IGSGFDNIDIK*    | 589.8 | 602.4 | 20.6 | y5 | light |
| CTBP1 | IGSGFDNIDIK*    | 593.8 | 872.5 | 20.6 | y7 | heavy |
| CTBP1 | IGSGFDNIDIK*    | 593.8 | 725.4 | 20.6 | y6 | heavy |
| CTBP1 | IGSGFDNIDIK*    | 593.8 | 610.4 | 20.6 | y5 | heavy |
| CTBP1 | QGAFVNTAR       | 538.8 | 673.4 | 19.1 | y6 | light |
| CTBP1 | QGAFVNTAR       | 538.8 | 560.3 | 19.1 | y5 | light |
| CTBP1 | QGAFVNTAR       | 538.8 | 461.2 | 19.1 | y4 | light |
| CTBP1 | QGAFVNTAR       | 543.8 | 683.4 | 19.1 | y6 | heavy |
| CTBP1 | QGAFVNTAR       | 543.8 | 570.3 | 19.1 | y5 | heavy |
| CTBP1 | QGAFVNTAR       | 543.8 | 471.3 | 19.1 | y4 | heavy |
| CTBP1 | VGQAVLR         | 407.3 | 714.4 | 15.1 | y7 | light |
| CTBP1 | VGQAVLR         | 407.3 | 529.3 | 15.1 | y5 | light |
| CTBP1 | VGQAVLR         | 407.3 | 458.3 | 15.1 | y4 | light |
| CTBP1 | VGQAVLR         | 412.3 | 724.4 | 15.1 | y7 | heavy |
| CTBP1 | VGQAVLR         | 412.3 | 539.4 | 15.1 | y5 | heavy |
| CTBP1 | VGQAVLR         | 412.3 | 468.3 | 15.1 | y4 | heavy |
| CTBP2 | IGSGYDNVDIK*    | 590.8 | 866.4 | 20.6 | y7 | light |
| CTBP2 | IGSGYDNVDIK*    | 590.8 | 703.4 | 20.6 | y6 | light |
| CTBP2 | IGSGYDNVDIK*    | 590.8 | 588.3 | 20.6 | y5 | light |
| CTBP2 | IGSGYDNVDIK*    | 594.8 | 874.4 | 20.6 | y7 | heavy |
| CTBP2 | IGSGYDNVDIK*    | 594.8 | 711.4 | 20.6 | y6 | heavy |
| CTBP2 | IGSGYDNVDIK*    | 594.8 | 596.3 | 20.6 | y5 | heavy |
| CTBP2 | QGAFVNAAR       | 523.8 | 643.4 | 18.6 | y6 | light |
| CTBP2 | QGAFVNAAR       | 523.8 | 530.3 | 18.6 | y5 | light |
| CTBP2 | QGAFVNAAR       | 523.8 | 431.2 | 18.6 | y4 | light |
| CTBP2 | QGAFVNAAR       | 528.8 | 653.4 | 18.6 | y6 | heavy |
| CTBP2 | QGAFVNAAR       | 528.8 | 540.3 | 18.6 | y5 | heavy |
| CTBP2 | QGAFVNAAR       | 528.8 | 441.2 | 18.6 | y4 | heavy |
| DCUN1 | SQLNDISSFK*     | 569.8 | 696.4 | 20   | y6 | light |

|         |                      |       |        |      |     |       |
|---------|----------------------|-------|--------|------|-----|-------|
| DCUN1   | SQLNDISSFK*          | 569.8 | 581.3  | 20   | y5  | light |
| DCUN1   | SQLNDISSFK*          | 569.8 | 468.2  | 20   | y4  | light |
| DCUN1   | SQLNDISSFK*          | 573.8 | 704.4  | 20   | y6  | heavy |
| DCUN1   | SQLNDISSFK*          | 573.8 | 589.3  | 20   | y5  | heavy |
| DCUN1   | SQLNDISSFK*          | 573.8 | 476.3  | 20   | y4  | heavy |
| CREB1   | ILNDLSSDAPGVPR*      | 727.4 | 885.4  | 24.7 | y9  | light |
| CREB1   | ILNDLSSDAPGVPR*      | 727.4 | 798.4  | 24.7 | y8  | light |
| CREB1   | ILNDLSSDAPGVPR*      | 727.4 | 525.3  | 24.7 | y5  | light |
| CREB1   | ILNDLSSDAPGVPR*      | 732.4 | 895.5  | 24.7 | y9  | heavy |
| CREB1   | ILNDLSSDAPGVPR*      | 732.4 | 808.4  | 24.7 | y8  | heavy |
| CREB1   | ILNDLSSDAPGVPR*      | 732.4 | 535.3  | 24.7 | y5  | heavy |
| Smarce1 | IAAEIAQAEEQAR*       | 700.4 | 831.4  | 23.9 | y7  | light |
| Smarce1 | IAAEIAQAEEQAR*       | 700.4 | 703.3  | 23.9 | y6  | light |
| Smarce1 | IAAEIAQAEEQAR*       | 700.4 | 632.3  | 23.9 | y5  | light |
| Smarce1 | IAAEIAQAEEQAR*       | 705.4 | 841.4  | 23.9 | y7  | heavy |
| Smarce1 | IAAEIAQAEEQAR*       | 705.4 | 713.3  | 23.9 | y6  | heavy |
| Smarce1 | IAAEIAQAEEQAR*       | 705.4 | 642.3  | 23.9 | y5  | heavy |
| MGMT    | FGETVSYQQLAALAGNPK*  | 947.5 | 670.4  | 31.3 | y7  | light |
| MGMT    | FGETVSYQQLAALAGNPK*  | 947.5 | 486.3  | 31.3 | y5  | light |
| MGMT    | FGETVSYQQLAALAGNPK*  | 947.5 | 415.2  | 31.3 | y4  | light |
| MGMT    | FGETVSYQQLAALAGNPK*  | 951.5 | 678.4  | 31.3 | y7  | heavy |
| MGMT    | FGETVSYQQLAALAGNPK*  | 951.5 | 494.3  | 31.3 | y5  | heavy |
| MGMT    | FGETVSYQQLAALAGNPK*  | 951.5 | 423.2  | 31.3 | y4  | heavy |
| MYBBP1a | QHFSFPLDDR*          | 631.3 | 996.5  | 21.8 | y8  | light |
| MYBBP1a | QHFSFPLDDR*          | 631.3 | 849.4  | 21.8 | y7  | light |
| MYBBP1a | QHFSFPLDDR*          | 631.3 | 615.3  | 21.8 | y5  | light |
| MYBBP1a | QHFSFPLDDR*          | 636.3 | 1006.5 | 21.8 | y8  | heavy |
| MYBBP1a | QHFSFPLDDR*          | 636.3 | 859.4  | 21.8 | y7  | heavy |
| MYBBP1a | QHFSFPLDDR*          | 636.3 | 625.3  | 21.8 | y5  | heavy |
| MYBBP1a | NAASQQDAVTEGAMPAATGK | 959.5 | 1132.6 | 31.7 | y12 | light |
| MYBBP1a | NAASQQDAVTEGAMPAATGK | 959.5 | 675.3  | 31.7 | y7  | light |
| MYBBP1a | NAASQQDAVTEGAMPAATGK | 959.5 | 544.3  | 31.7 | y6  | light |
| MYBBP1a | NAASQQDAVTEGAMPAATGK | 963.5 | 1140.6 | 31.7 | y12 | heavy |
| MYBBP1a | NAASQQDAVTEGAMPAATGK | 963.5 | 683.4  | 31.7 | y7  | heavy |
| MYBBP1a | NAASQQDAVTEGAMPAATGK | 963.5 | 552.3  | 31.7 | y6  | heavy |
| MYBBP1a | LSQVNGATPVSPIEPESK   | 927.0 | 1082.6 | 30.7 | y10 | light |
| MYBBP1a | LSQVNGATPVSPIEPESK   | 927.0 | 799.4  | 30.7 | y7  | light |
| MYBBP1a | LSQVNGATPVSPIEPESK   | 927.0 | 460.2  | 30.7 | y4  | light |
| MYBBP1a | LSQVNGATPVSPIEPESK   | 931.0 | 1090.6 | 30.7 | y10 | heavy |
| MYBBP1a | LSQVNGATPVSPIEPESK   | 931.0 | 807.4  | 30.7 | y7  | heavy |
| MYBBP1a | LSQVNGATPVSPIEPESK   | 931.0 | 468.3  | 30.7 | y4  | heavy |

|       |                      |        |        |      |     |       |
|-------|----------------------|--------|--------|------|-----|-------|
| PPARG | LLAEISSDIDQLNPESADLR | 1100.1 | 901.4  | 35.9 | y8  | light |
| PPARG | LLAEISSDIDQLNPESADLR | 1100.1 | 787.4  | 35.9 | y7  | light |
| PPARG | LLAEISSDIDQLNPESADLR | 1100.1 | 561.3  | 35.9 | y5  | light |
| PPARG | LLAEISSDIDQLNPESADLR | 1105.1 | 911.4  | 35.9 | y8  | heavy |
| PPARG | LLAEISSDIDQLNPESADLR | 1105.1 | 797.4  | 35.9 | y7  | heavy |
| PPARG | LLAEISSDIDQLNPESADLR | 1105.1 | 571.3  | 35.9 | y5  | heavy |
| PPARG | SVEAVQEITEYAK*       | 733.9  | 1151.6 | 24.9 | y10 | light |
| PPARG | SVEAVQEITEYAK*       | 733.9  | 1080.6 | 24.9 | y9  | light |
| PPARG | SVEAVQEITEYAK*       | 733.9  | 981.5  | 24.9 | y8  | light |
| PPARG | SVEAVQEITEYAK*       | 733.9  | 853.4  | 24.9 | y7  | light |
| PPARG | SVEAVQEITEYAK*       | 733.9  | 724.4  | 24.9 | y6  | light |
| PPARG | SVEAVQEITEYAK*       | 733.9  | 611.3  | 24.9 | y5  | light |
| PPARG | SVEAVQEITEYAK*       | 733.9  | 510.3  | 24.9 | y4  | light |
| PPARG | SVEAVQEITEYAK*       | 737.9  | 1159.6 | 24.9 | y10 | heavy |
| PPARG | SVEAVQEITEYAK*       | 737.9  | 1088.6 | 24.9 | y9  | heavy |
| PPARG | SVEAVQEITEYAK*       | 738.9  | 989.5  | 24.9 | y8  | heavy |
| PPARG | SVEAVQEITEYAK*       | 737.9  | 861.4  | 24.9 | y7  | heavy |
| PPARG | SVEAVQEITEYAK*       | 737.9  | 732.4  | 24.9 | y6  | heavy |
| PPARG | SVEAVQEITEYAK*       | 737.9  | 619.3  | 24.9 | y5  | heavy |
| PPARG | SVEAVQEITEYAK*       | 737.9  | 518.3  | 24.9 | y4  | heavy |
| CEBPA | VLELSDNDR*           | 581.3  | 820.4  | 20.3 | y7  | light |
| CEBPA | VLELSDNDR*           | 581.3  | 707.3  | 20.3 | y6  | light |
| CEBPA | VLELSDNDR*           | 581.3  | 606.2  | 20.3 | y5  | light |
| CEBPA | VLELSDNDR*           | 586.3  | 830.4  | 20.3 | y7  | heavy |
| CEBPA | VLELSDNDR*           | 586.3  | 717.3  | 20.3 | y6  | heavy |
| CEBPA | VLELSDNDR*           | 586.3  | 616.3  | 20.3 | y5  | heavy |
| CEBPB | VLELSDNDR            | 587.3  | 961.5  | 20.5 | y8  | light |
| CEBPB | VLELSDNDR            | 587.3  | 832.4  | 20.5 | y7  | light |
| CEBPB | VLELSDNDR            | 587.3  | 719.3  | 20.5 | y6  | light |
| CEBPB | VLELSDNDR            | 592.3  | 971.5  | 20.5 | y8  | heavy |
| CEBPB | VLELSDNDR            | 592.3  | 842.4  | 20.5 | y7  | heavy |
| CEBPB | VLELSDNDR            | 592.3  | 729.3  | 20.5 | y6  | heavy |
| CEBPB | APAAEPAIGEHER*       | 674.3  | 1037.5 | 24   | y9  | light |
| CEBPB | APAAEPAIGEHER*       | 674.3  | 908.5  | 24   | y8  | light |
| CEBPB | APAAEPAIGEHER*       | 674.3  | 627.3  | 24   | y5  | light |
| CEBPB | APAAEPAIGEHER*       | 679.3  | 1047.5 | 24   | y9  | heavy |
| CEBPB | APAAEPAIGEHER*       | 679.3  | 918.5  | 24   | y8  | heavy |
| CEBPB | APAAEPAIGEHER*       | 679.3  | 637.3  | 24   | y5  | heavy |
| CEBPB | AAPAACFAGPPAAPAK     | 734.4  | 779.4  | 24.9 | y9  | light |
| CEBPB | AAPAACFAGPPAAPAK     | 734.4  | 708.4  | 24.9 | y8  | light |
| CEBPB | AAPAACFAGPPAAPAK     | 734.4  | 651.4  | 24.9 | y7  | light |

|        |                  |       |       |      |    |       |
|--------|------------------|-------|-------|------|----|-------|
| CEBPB  | AAPAACFAGPPAAPAK | 738.4 | 787.5 | 24.9 | y9 | heavy |
| CEBPB  | AAPAACFAGPPAAPAK | 738.4 | 716.4 | 24.9 | y8 | heavy |
| CEBPB  | AAPAACFAGPPAAPAK | 738.4 | 659.4 | 24.9 | y7 | heavy |
| CEBPZ  | MLSAILTGVNR*     | 587.8 | 930.5 | 20.5 | y9 | light |
| CEBPZ  | MLSAILTGVNR*     | 587.8 | 659.4 | 20.5 | y6 | light |
| CEBPZ  | MLSAILTGVNR*     | 587.8 | 546.3 | 20.5 | y5 | light |
| CEBPZ  | MLSAILTGVNR*     | 592.8 | 940.5 | 20.5 | y9 | heavy |
| CEBPZ  | MLSAILTGVNR*     | 592.8 | 669.4 | 20.5 | y6 | heavy |
| CEBPZ  | MLSAILTGVNR*     | 592.8 | 556.3 | 20.5 | y5 | heavy |
| CEBPZ  | ELLITDLLPDSR     | 692.9 | 916.5 | 21   | y8 | light |
| CEBPZ  | ELLITDLLPDSR     | 692.9 | 587.3 | 21   | y5 | light |
| CEBPZ  | ELLITDLLPDSR     | 692.9 | 474.2 | 21   | y4 | light |
| CEBPZ  | ELLITDLLPDSR     | 697.9 | 926.5 | 21   | y8 | heavy |
| CEBPZ  | ELLITDLLPDSR     | 697.9 | 597.3 | 21   | y5 | heavy |
| CEBPZ  | ELLITDLLPDSR     | 697.9 | 484.2 | 21   | y4 | heavy |
| EEF1A1 | IGGIGTVPVGR*     | 513.3 | 685.4 | 18.3 | y7 | light |
| EEF1A1 | IGGIGTVPVGR*     | 513.3 | 628.4 | 18.3 | y6 | light |
| EEF1A1 | IGGIGTVPVGR*     | 513.3 | 428.3 | 18.3 | y4 | light |
| EEF1A1 | IGGIGTVPVGR*     | 518.3 | 695.4 | 18.3 | y7 | heavy |
| EEF1A1 | IGGIGTVPVGR*     | 518.3 | 638.4 | 18.3 | y6 | heavy |
| EEF1A1 | IGGIGTVPVGR*     | 518.3 | 438.3 | 18.3 | y4 | heavy |
| EEF1A1 | YYVTIIDAPGHR     | 702.9 | 765.4 | 24   | y7 | light |
| EEF1A1 | YYVTIIDAPGHR     | 702.9 | 652.3 | 24   | y6 | light |
| EEF1A1 | YYVTIIDAPGHR     | 702.9 | 537.3 | 24   | y5 | light |
| EEF1A1 | YYVTIIDAPGHR     | 707.9 | 775.4 | 24   | y7 | heavy |
| EEF1A1 | YYVTIIDAPGHR     | 707.9 | 662.3 | 24   | y6 | heavy |
| EEF1A1 | YYVTIIDAPGHR     | 707.9 | 547.3 | 24   | y5 | heavy |
| FLNA   | SPFEVYVDK        | 542.3 | 752.4 | 19.2 | y6 | light |
| FLNA   | SPFEVYVDK        | 542.3 | 623.3 | 19.2 | y5 | light |
| FLNA   | SPFEVYVDK        | 542.3 | 524.3 | 19.2 | y4 | light |
| FLNA   | SPFEVYVDK        | 546.3 | 760.4 | 19.2 | y6 | heavy |
| FLNA   | SPFEVYVDK        | 546.3 | 631.4 | 19.2 | y5 | heavy |
| FLNA   | SPFEVYVDK        | 546.3 | 532.3 | 19.2 | y4 | heavy |
| FLNA   | YNDQHIPGSPFTAR*  | 801.9 | 832.4 | 27   | y8 | light |
| FLNA   | YNDQHIPGSPFTAR*  | 801.9 | 735.4 | 27   | y7 | light |
| FLNA   | YNDQHIPGSPFTAR*  | 801.9 | 591.3 | 27   | y5 | light |
| FLNA   | YNDQHIPGSPFTAR*  | 806.9 | 842.4 | 27   | y8 | heavy |
| FLNA   | YNDQHIPGSPFTAR*  | 806.9 | 745.4 | 27   | y7 | heavy |
| FLNA   | YNDQHIPGSPFTAR*  | 806.9 | 601.3 | 27   | y5 | heavy |
| FOXC2  | SEAASPALPVITK*   | 642.4 | 838.5 | 22.2 | y8 | light |
| FOXC2  | SEAASPALPVITK*   | 642.4 | 670.4 | 22.2 | y6 | light |

|         |                  |       |        |      |     |       |
|---------|------------------|-------|--------|------|-----|-------|
| FOXC2   | SEAASPALPVITK*   | 642.4 | 557.4  | 22.2 | y5  | light |
| FOXC2   | SEAASPALPVITK*   | 646.4 | 846.6  | 22.2 | y8  | heavy |
| FOXC2   | SEAASPALPVITK*   | 646.4 | 678.5  | 22.2 | y6  | heavy |
| FOXC2   | SEAASPALPVITK*   | 646.4 | 565.4  | 22.2 | y5  | heavy |
| APEX1   | EEAPDILCLQETK    | 773.4 | 891.5  | 26.1 | y7  | light |
| APEX1   | EEAPDILCLQETK    | 773.4 | 778.4  | 26.1 | y6  | light |
| APEX1   | EEAPDILCLQETK    | 773.4 | 618.3  | 26.1 | y5  | light |
| APEX1   | EEAPDILCLQETK    | 777.4 | 899.5  | 26.1 | y7  | heavy |
| APEX1   | EEAPDILCLQETK    | 777.4 | 786.4  | 26.1 | y6  | heavy |
| APEX1   | EEAPDILCLQETK    | 777.4 | 626.4  | 26.1 | y5  | heavy |
| APEX1   | ICSWNVVDGLR*     | 610.3 | 946.5  | 21.2 | y8  | light |
| APEX1   | ICSWNVVDGLR*     | 610.3 | 859.4  | 21.2 | y7  | light |
| APEX1   | ICSWNVVDGLR*     | 610.3 | 673.4  | 21.2 | y6  | light |
| APEX1   | ICSWNVVDGLR*     | 615.3 | 956.5  | 21.2 | y8  | heavy |
| APEX1   | ICSWNVVDGLR*     | 615.3 | 869.5  | 21.2 | y7  | heavy |
| APEX1   | ICSWNVVDGLR*     | 615.3 | 683.4  | 21.2 | y6  | heavy |
| APEX1   | VSYGIGEEHHDQEGR  | 568.9 | 870.4  | 23.9 | y7  | light |
| APEX1   | VSYGIGEEHHDQEGR  | 568.9 | 741.3  | 23.9 | y6  | light |
| APEX1   | VSYGIGEEHHDQEGR  | 568.9 | 604.3  | 23.9 | y5  | light |
| APEX1   | VSYGIGEEHHDQEGR  | 572.3 | 880.4  | 23.9 | y7  | heavy |
| APEX1   | VSYGIGEEHHDQEGR  | 572.3 | 751.3  | 23.9 | y6  | heavy |
| APEX1   | VSYGIGEEHHDQEGR  | 572.3 | 614.3  | 23.9 | y5  | heavy |
| SMARCA5 | TEQEEDEELLTESSK* | 883.9 | 1150.5 | 29.4 | y10 | light |
| SMARCA5 | TEQEEDEELLTESSK* | 883.9 | 906.5  | 29.4 | y8  | light |
| SMARCA5 | TEQEEDEELLTESSK* | 883.9 | 777.4  | 29.4 | y7  | light |
| SMARCA5 | TEQEEDEELLTESSK* | 887.9 | 1158.6 | 29.4 | y10 | heavy |
| SMARCA5 | TEQEEDEELLTESSK* | 887.9 | 914.5  | 29.4 | y8  | heavy |
| SMARCA5 | TEQEEDEELLTESSK* | 887.9 | 785.4  | 29.4 | y7  | heavy |
| SMARCA5 | ESEITDEDIDGILER  | 867.4 | 702.4  | 28.9 | y6  | light |
| SMARCA5 | ESEITDEDIDGILER  | 867.4 | 587.4  | 28.9 | y5  | light |
| SMARCA5 | ESEITDEDIDGILER  | 867.4 | 417.2  | 28.9 | y3  | light |
| SMARCA5 | ESEITDEDIDGILER  | 872.4 | 712.4  | 28.9 | y6  | heavy |
| SMARCA5 | ESEITDEDIDGILER  | 872.4 | 597.4  | 28.9 | y5  | heavy |
| SMARCA5 | ESEITDEDIDGILER  | 872.4 | 427.3  | 28.9 | y3  | heavy |
| SMARCA4 | GLQSYVAHAHAVTER  | 832.9 | 1116.6 | 27.9 | y10 | light |
| SMARCA4 | GLQSYVAHAHAVTER  | 832.9 | 953.5  | 27.9 | y9  | light |
| SMARCA4 | GLQSYVAHAHAVTER  | 832.9 | 783.4  | 27.9 | y7  | light |
| SMARCA4 | GLQSYVAHAHAVTER  | 837.9 | 1126.6 | 27.9 | y10 | heavy |
| SMARCA4 | GLQSYVAHAHAVTER  | 837.9 | 963.5  | 27.9 | y9  | heavy |
| SMARCA4 | GLQSYVAHAHAVTER  | 837.9 | 793.4  | 27.9 | y7  | heavy |
| SMARCA4 | GQPLPDHLQMAVQGK* | 809.9 | 1223.6 | 27.2 | y11 | light |

|         |                  |       |        |      |     |       |
|---------|------------------|-------|--------|------|-----|-------|
| SMARCA4 | GQPLPDHLQMAVQGK* | 809.9 | 1011.5 | 27.2 | y9  | light |
| SMARCA4 | GQPLPDHLQMAVQGK* | 809.9 | 502.3  | 27.2 | y5  | light |
| SMARCA4 | GQPLPDHLQMAVQGK* | 813.9 | 1231.6 | 27.2 | y11 | heavy |
| SMARCA4 | GQPLPDHLQMAVQGK* | 813.9 | 1019.6 | 27.2 | y9  | heavy |
| SMARCA4 | GQPLPDHLQMAVQGK* | 813.9 | 510.3  | 27.2 | y5  | heavy |
| SMARC2D | AAFYHQPWAQEAVGR* | 865.9 | 1141.6 | 28.9 | y10 | light |
| SMARC2D | AAFYHQPWAQEAVGR* | 865.9 | 1013.5 | 28.9 | y9  | light |
| SMARC2D | AAFYHQPWAQEAVGR* | 865.9 | 531.3  | 28.9 | y5  | light |
| SMARC2D | AAFYHQPWAQEAVGR* | 870.9 | 1151.6 | 28.9 | y10 | heavy |
| SMARC2D | AAFYHQPWAQEAVGR* | 870.9 | 1023.5 | 28.9 | y9  | heavy |
| SMARC2D | AAFYHQPWAQEAVGR* | 870.9 | 541.3  | 28.9 | y5  | heavy |
| CSTF3   | LVAQFPSSGR*      | 531.3 | 849.4  | 18.8 | y8  | light |
| CSTF3   | LVAQFPSSGR*      | 531.3 | 650.3  | 18.8 | y6  | light |
| CSTF3   | LVAQFPSSGR*      | 531.3 | 503.3  | 18.8 | y5  | light |
| CSTF3   | LVAQFPSSGR*      | 536.3 | 859.4  | 18.8 | y8  | heavy |
| CSTF3   | LVAQFPSSGR*      | 536.3 | 660.3  | 18.8 | y6  | heavy |
| CSTF3   | LVAQFPSSGR*      | 536.3 | 513.3  | 18.8 | y5  | heavy |
| SFRS1   | EAGDVCYADVYR*    | 709.3 | 946.4  | 24.2 | y7  | light |
| SFRS1   | EAGDVCYADVYR*    | 709.3 | 786.4  | 24.2 | y6  | light |
| SFRS1   | EAGDVCYADVYR*    | 709.3 | 623.3  | 24.2 | y5  | light |
| SFRS1   | EAGDVCYADVYR*    | 714.3 | 956.4  | 24.2 | y7  | heavy |
| SFRS1   | EAGDVCYADVYR*    | 714.3 | 796.4  | 24.2 | y6  | heavy |
| SFRS1   | EAGDVCYADVYR*    | 714.3 | 633.3  | 24.2 | y5  | heavy |
| SFRS1   | DGTGVVEFVR       | 539.8 | 805.5  | 19.1 | y7  | light |
| SFRS1   | DGTGVVEFVR       | 539.8 | 649.4  | 19.1 | y5  | light |
| SFRS1   | DGTGVVEFVR       | 539.8 | 550.3  | 19.1 | y4  | light |
| SFRS1   | DGTGVVEFVR       | 544.8 | 815.5  | 19.1 | y7  | heavy |
| SFRS1   | DGTGVVEFVR       | 544.8 | 659.4  | 19.1 | y5  | heavy |
| SFRS1   | DGTGVVEFVR       | 544.8 | 560.3  | 19.1 | y4  | heavy |
| SFRS1   | EDMTYAVR         | 492.7 | 740.4  | 17.7 | y6  | light |
| SFRS1   | EDMTYAVR         | 492.7 | 609.3  | 17.7 | y5  | light |
| SFRS1   | EDMTYAVR         | 492.7 | 508.3  | 17.7 | y4  | light |
| SFRS1   | EDMTYAVR         | 497.7 | 750.4  | 17.7 | y6  | heavy |
| SFRS1   | EDMTYAVR         | 497.7 | 619.3  | 17.7 | y5  | heavy |
| SFRS1   | EDMTYAVR         | 497.7 | 518.3  | 17.7 | y4  | heavy |
| UBAP2L  | LDFIGVEGSNYPR*   | 733.9 | 978.5  | 24.9 | y9  | light |
| UBAP2L  | LDFIGVEGSNYPR*   | 733.9 | 822.4  | 24.9 | y7  | light |
| UBAP2L  | LDFIGVEGSNYPR*   | 733.9 | 693.3  | 24.9 | y6  | light |
| UBAP2L  | LDFIGVEGSNYPR*   | 738.9 | 988.5  | 24.9 | y9  | heavy |
| UBAP2L  | LDFIGVEGSNYPR*   | 738.9 | 832.4  | 24.9 | y7  | heavy |
| UBAP2L  | LDFIGVEGSNYPR*   | 738.9 | 703.3  | 24.9 | y6  | heavy |



|        |                    |       |        |      |    |       |
|--------|--------------------|-------|--------|------|----|-------|
| UBAP2L | DGSLASNPYSGDLTK    | 762.9 | 994.5  | 25.8 | y9 | light |
| UBAP2L | DGSLASNPYSGDLTK    | 762.9 | 880.4  | 25.8 | y8 | light |
| UBAP2L | DGSLASNPYSGDLTK    | 762.9 | 620.3  | 25.8 | y6 | light |
| UBAP2L | DGSLASNPYSGDLTK    | 766.9 | 1002.5 | 25.8 | y9 | heavy |
| UBAP2L | DGSLASNPYSGDLTK    | 766.9 | 888.5  | 25.8 | y8 | heavy |
| UBAP2L | DGSLASNPYSGDLTK    | 766.9 | 628.3  | 25.8 | y6 | heavy |
| NEDD4  | LQNVAITGPAVPYSR    | 793.4 | 947.5  | 26.7 | y9 | light |
| NEDD4  | LQNVAITGPAVPYSR    | 793.4 | 846.4  | 26.7 | y8 | light |
| NEDD4  | LQNVAITGPAVPYSR    | 793.4 | 522.3  | 26.7 | y4 | light |
| NEDD4  | LQNVAITGPAVPYSR    | 798.4 | 957.5  | 26.7 | y9 | heavy |
| NEDD4  | LQNVAITGPAVPYSR    | 798.4 | 856.5  | 26.7 | y8 | heavy |
| NEDD4  | LQNVAITGPAVPYSR    | 798.4 | 532.3  | 26.7 | y4 | heavy |
| NEDD4  | TGGSEIVVTNK*       | 552.8 | 802.5  | 19.5 | y7 | light |
| NEDD4  | TGGSEIVVTNK*       | 552.8 | 673.4  | 19.5 | y6 | light |
| NEDD4  | TGGSEIVVTNK*       | 552.8 | 560.3  | 19.5 | y5 | light |
| NEDD4  | TGGSEIVVTNK*       | 556.8 | 810.5  | 19.5 | y7 | heavy |
| NEDD4  | TGGSEIVVTNK*       | 556.8 | 681.4  | 19.5 | y6 | heavy |
| NEDD4  | TGGSEIVVTNK*       | 556.8 | 568.4  | 19.5 | y5 | heavy |
| CRRP1  | TVYFAEEVQCEGNSFHK* | 682.3 | 978.4  | 28.2 | y8 | light |
| CRRP1  | TVYFAEEVQCEGNSFHK* | 682.3 | 818.4  | 28.2 | y7 | light |
| CRRP1  | TVYFAEEVQCEGNSFHK* | 682.3 | 689.3  | 28.2 | y6 | light |
| CRRP1  | TVYFAEEVQCEGNSFHK* | 685.0 | 986.4  | 28.2 | y8 | heavy |
| CRRP1  | TVYFAEEVQCEGNSFHK* | 685.0 | 826.4  | 28.2 | y7 | heavy |
| CRRP1  | TVYFAEEVQCEGNSFHK* | 685.0 | 697.4  | 28.2 | y6 | heavy |
| NONO   | FACHSASLTVR*       | 624.8 | 870.5  | 21.6 | y8 | light |
| NONO   | FACHSASLTVR*       | 624.8 | 733.4  | 21.6 | y7 | light |
| NONO   | FACHSASLTVR*       | 624.8 | 646.4  | 21.6 | y6 | light |
| NONO   | FACHSASLTVR*       | 629.8 | 880.5  | 21.6 | y8 | heavy |
| NONO   | FACHSASLTVR*       | 629.8 | 743.4  | 21.6 | y7 | heavy |
| NONO   | FACHSASLTVR*       | 629.8 | 656.4  | 21.6 | y6 | heavy |
| MYH9   | ALEQQVEEMK*        | 602.8 | 1020.5 | 21   | y8 | light |
| MYH9   | ALEQQVEEMK*        | 602.8 | 635.3  | 21   | y5 | light |
| MYH9   | ALEQQVEEMK*        | 602.8 | 536.2  | 21   | y4 | light |
| MYH9   | ALEQQVEEMK*        | 606.8 | 1028.5 | 21   | y8 | heavy |
| MYH9   | ALEQQVEEMK*        | 606.8 | 643.3  | 21   | y5 | heavy |
| MYH9   | ALEQQVEEMK*        | 606.8 | 544.3  | 21   | y4 | heavy |
| ELAVL1 | DANLYISGLPR        | 609.8 | 805.5  | 21.2 | y7 | light |
| ELAVL1 | DANLYISGLPR        | 609.8 | 642.4  | 21.2 | y6 | light |
| ELAVL1 | DANLYISGLPR        | 609.8 | 529.3  | 21.2 | y5 | light |
| ELAVL1 | DANLYISGLPR        | 614.8 | 815.5  | 21.2 | y7 | heavy |
| ELAVL1 | DANLYISGLPR        | 614.8 | 652.4  | 21.2 | y6 | heavy |

|         |                |       |       |      |    |       |
|---------|----------------|-------|-------|------|----|-------|
| ELAVL1  | DANLYISGLPR    | 614.8 | 539.3 | 21.2 | y5 | heavy |
| ELAVL1  | SLFSSIGEVESAK* | 677.3 | 919.5 | 23.2 | y9 | light |
| ELAVL1  | SLFSSIGEVESAK* | 677.3 | 832.4 | 23.2 | y8 | light |
| ELAVL1  | SLFSSIGEVESAK* | 677.3 | 719.4 | 23.2 | y7 | light |
| ELAVL1  | SLFSSIGEVESAK* | 681.4 | 927.5 | 23.2 | y9 | heavy |
| ELAVL1  | SLFSSIGEVESAK* | 681.4 | 840.5 | 23.2 | y8 | heavy |
| ELAVL1  | SLFSSIGEVESAK* | 681.4 | 727.4 | 23.2 | y7 | heavy |
| GSK3B   | LLEYTPAR*      | 532.3 | 837.4 | 18.9 | y7 | light |
| GSK3B   | LLEYTPAR*      | 532.3 | 708.4 | 18.9 | y6 | light |
| GSK3B   | LLEYTPAR*      | 532.3 | 444.3 | 18.9 | y4 | light |
| GSK3B   | LLEYTPAR*      | 537.3 | 847.4 | 18.9 | y7 | heavy |
| GSK3B   | LLEYTPAR*      | 537.3 | 718.4 | 18.9 | y6 | heavy |
| GSK3B   | LLEYTPAR*      | 537.3 | 454.3 | 18.9 | y4 | heavy |
| GSK3B   | TPPEAIALCSR    | 607.8 | 790.4 | 21.1 | y7 | light |
| GSK3B   | TPPEAIALCSR    | 607.8 | 719.4 | 21.1 | y6 | light |
| GSK3B   | TPPEAIALCSR    | 607.8 | 606.3 | 21.1 | y5 | light |
| GSK3B   | TPPEAIALCSR    | 612.8 | 800.4 | 21.1 | y7 | heavy |
| GSK3B   | TPPEAIALCSR    | 612.8 | 729.4 | 21.1 | y6 | heavy |
| GSK3B   | TPPEAIALCSR    | 612.8 | 616.3 | 21.1 | y5 | heavy |
| LMNA C2 | AAYEALGDAR     | 583.3 | 731.4 | 20.4 | y7 | light |
| LMNA C2 | AAYEALGDAR     | 583.3 | 660.3 | 20.4 | y6 | light |
| LMNA C2 | AAYEALGDAR     | 583.3 | 418.2 | 20.4 | y4 | light |
| LMNA C2 | AAYEALGDAR     | 588.3 | 741.4 | 20.4 | y7 | heavy |
| LMNA C2 | AAYEALGDAR     | 588.3 | 670.3 | 20.4 | y6 | heavy |
| LMNA C2 | AAYEALGDAR     | 588.3 | 428.2 | 20.4 | y4 | heavy |
| LMNA C2 | ITESEEVVSR     | 574.8 | 718.4 | 20.1 | y6 | light |
| LMNA C2 | ITESEEVVSR     | 574.8 | 589.3 | 20.1 | y5 | light |
| LMNA C2 | ITESEEVVSR     | 574.8 | 460.3 | 20.1 | y4 | light |
| LMNA C2 | ITESEEVVSR     | 579.8 | 728.4 | 20.1 | y6 | heavy |
| LMNA C2 | ITESEEVVSR     | 579.8 | 599.3 | 20.1 | y5 | heavy |
| LMNA C2 | ITESEEVVSR     | 579.8 | 470.3 | 20.1 | y4 | heavy |
| LMNA C2 | EGDLLAAQAR*    | 522.3 | 629.4 | 18.6 | y6 | light |
| LMNA C2 | EGDLLAAQAR*    | 522.3 | 516.3 | 18.6 | y5 | light |
| LMNA C2 | EGDLLAAQAR*    | 522.3 | 445.3 | 18.6 | y4 | light |
| LMNA C2 | EGDLLAAQAR*    | 527.3 | 639.4 | 18.6 | y6 | heavy |
| LMNA C2 | EGDLLAAQAR*    | 527.3 | 526.3 | 18.6 | y5 | heavy |
| LMNA C2 | EGDLLAAQAR*    | 527.3 | 455.3 | 18.6 | y4 | heavy |
| NFKB1   | VFETLEAR*      | 482.8 | 865.4 | 17.4 | y7 | light |
| NFKB1   | VFETLEAR*      | 482.8 | 718.4 | 17.4 | y6 | light |
| NFKB1   | VFETLEAR*      | 482.8 | 589.3 | 17.4 | y5 | light |
| NFKB1   | VFETLEAR*      | 487.8 | 875.4 | 17.4 | y7 | heavy |

|         |                   |       |        |      |     |       |
|---------|-------------------|-------|--------|------|-----|-------|
| NFKB1   | VFETLEAR*         | 487.8 | 728.4  | 17.4 | y6  | heavy |
| NFKB1   | VFETLEAR*         | 487.8 | 599.3  | 17.4 | y5  | heavy |
| NSUN2   | IITVSMEDVK        | 567.8 | 708.3  | 19.9 | y6  | light |
| NSUN2   | IITVSMEDVK        | 567.8 | 621.3  | 19.9 | y5  | light |
| NSUN2   | IITVSMEDVK        | 567.8 | 490.3  | 19.9 | y4  | light |
| NSUN2   | IITVSMEDVK        | 571.8 | 716.3  | 19.9 | y6  | heavy |
| NSUN2   | IITVSMEDVK        | 571.8 | 629.3  | 19.9 | y5  | heavy |
| NSUN2   | IITVSMEDVK        | 571.8 | 498.3  | 19.9 | y4  | heavy |
| NSUN2   | LFEHYYQELK*       | 685.3 | 843.4  | 23.5 | y6  | light |
| NSUN2   | LFEHYYQELK*       | 685.3 | 680.4  | 23.5 | y5  | light |
| NSUN2   | LFEHYYQELK*       | 685.3 | 517.3  | 23.5 | y4  | light |
| NSUN2   | LFEHYYQELK*       | 689.4 | 851.4  | 23.5 | y6  | heavy |
| NSUN2   | LFEHYYQELK*       | 689.4 | 688.4  | 23.5 | y5  | heavy |
| NSUN2   | LFEHYYQELK*       | 689.4 | 525.3  | 23.5 | y4  | heavy |
| NSUN2   | TLLTQENPFFR       | 683.4 | 809.4  | 23.4 | y6  | light |
| NSUN2   | TLLTQENPFFR       | 683.4 | 680.4  | 23.4 | y5  | light |
| NSUN2   | TLLTQENPFFR       | 683.4 | 566.3  | 23.4 | y4  | light |
| NSUN2   | TLLTQENPFFR       | 688.4 | 819.4  | 23.4 | y6  | heavy |
| NSUN2   | TLLTQENPFFR       | 688.4 | 690.4  | 23.4 | y5  | heavy |
| NSUN2   | TLLTQENPFFR       | 688.4 | 576.3  | 23.4 | y4  | heavy |
| PCBD2   | NFNQAFGFMSR*      | 659.8 | 815.4  | 22.7 | y7  | light |
| PCBD2   | NFNQAFGFMSR*      | 659.8 | 744.3  | 22.7 | y6  | light |
| PCBD2   | NFNQAFGFMSR*      | 659.8 | 597.3  | 22.7 | y5  | light |
| PCBD2   | NFNQAFGFMSR*      | 664.8 | 825.4  | 22.7 | y7  | heavy |
| PCBD2   | NFNQAFGFMSR*      | 664.8 | 754.4  | 22.7 | y6  | heavy |
| PCBD2   | NFNQAFGFMSR*      | 664.8 | 607.3  | 22.7 | y5  | heavy |
| RCOR1   | VGPQYQAAVPDFDPAK* | 851.9 | 1030.5 | 28.5 | y10 | light |
| RCOR1   | VGPQYQAAVPDFDPAK* | 851.9 | 888.4  | 28.5 | y8  | light |
| RCOR1   | VGPQYQAAVPDFDPAK* | 851.9 | 789.4  | 28.5 | y7  | light |
| RCOR1   | VGPQYQAAVPDFDPAK* | 855.9 | 1038.5 | 28.5 | y10 | heavy |
| RCOR1   | VGPQYQAAVPDFDPAK* | 855.9 | 896.5  | 28.5 | y8  | heavy |
| RCOR1   | VGPQYQAAVPDFDPAK* | 855.9 | 797.4  | 28.5 | y7  | heavy |
| SMARCC2 | AGGSLCHILAAAYK*   | 716.4 | 1046.5 | 24.4 | y9  | light |
| SMARCC2 | AGGSLCHILAAAYK*   | 716.4 | 886.5  | 24.4 | y8  | light |
| SMARCC2 | AGGSLCHILAAAYK*   | 716.4 | 636.4  | 24.4 | y6  | light |
| SMARCC2 | AGGSLCHILAAAYK*   | 716.4 | 523.3  | 24.4 | y5  | light |
| SMARCC2 | AGGSLCHILAAAYK*   | 720.4 | 1054.6 | 24.4 | y9  | heavy |
| SMARCC2 | AGGSLCHILAAAYK*   | 720.4 | 894.5  | 24.4 | y8  | heavy |
| SMARCC2 | AGGSLCHILAAAYK*   | 720.4 | 644.4  | 24.4 | y6  | heavy |
| SMARCC2 | AGGSLCHILAAAYK*   | 720.4 | 531.3  | 24.4 | y5  | heavy |
| SMARCC2 | YIQAEPTNK         | 580.8 | 685.4  | 20.3 | y6  | light |

|         |                     |       |       |      |    |       |
|---------|---------------------|-------|-------|------|----|-------|
| SMARCC2 | YIQAEPPPTNK         | 580.8 | 556.3 | 20.3 | y5 | light |
| SMARCC2 | YIQAEPPPTNK         | 580.8 | 459.3 | 20.3 | y4 | light |
| SMARCC2 | YIQAEPPPTNK         | 584.8 | 693.4 | 20.3 | y6 | heavy |
| SMARCC2 | YIQAEPPPTNK         | 584.8 | 564.3 | 20.3 | y5 | heavy |
| SMARCC2 | YIQAEPPPTNK         | 584.8 | 467.3 | 20.3 | y4 | heavy |
| TAX1BP3 | VSEGGPAEIALGLQIGDK* | 820.9 | 914.5 | 27.5 | y9 | light |
| TAX1BP3 | VSEGGPAEIALGLQIGDK* | 820.9 | 801.4 | 27.5 | y8 | light |
| TAX1BP3 | VSEGGPAEIALGLQIGDK* | 820.9 | 730.4 | 27.5 | y7 | light |
| TAX1BP3 | VSEGGPAEIALGLQIGDK* | 824.9 | 922.5 | 27.5 | y9 | heavy |
| TAX1BP3 | VSEGGPAEIALGLQIGDK* | 824.9 | 809.5 | 27.5 | y8 | heavy |
| TAX1BP3 | VSEGGPAEIALGLQIGDK* | 824.9 | 738.4 | 27.5 | y7 | heavy |
| TRIM28  | LDLDTSDSQPPVFK*     | 837.9 | 802.4 | 28   | y7 | light |
| TRIM28  | LDLDTSDSQPPVFK*     | 837.9 | 587.4 | 28   | y5 | light |
| TRIM28  | LDLDTSDSQPPVFK*     | 837.9 | 490.3 | 28   | y4 | light |
| TRIM28  | LDLDTSDSQPPVFK*     | 841.9 | 810.5 | 28   | y7 | heavy |
| TRIM28  | LDLDTSDSQPPVFK*     | 841.9 | 595.4 | 28   | y5 | heavy |
| TRIM28  | LDLDTSDSQPPVFK*     | 841.9 | 498.3 | 28   | y4 | heavy |
| TRIM28  | SGEGEVSGLLR         | 552.3 | 644.4 | 19.5 | y6 | light |
| TRIM28  | SGEGEVSGLLR         | 552.3 | 545.3 | 19.5 | y5 | light |
| TRIM28  | SGEGEVSGLLR         | 552.3 | 458.3 | 19.5 | y4 | light |
| TRIM28  | SGEGEVSGLLR         | 557.3 | 654.4 | 19.5 | y6 | heavy |
| TRIM28  | SGEGEVSGLLR         | 557.3 | 555.3 | 19.5 | y5 | heavy |
| TRIM28  | SGEGEVSGLLR         | 557.3 | 468.3 | 19.5 | y4 | heavy |
| TRIM28  | DHQYQFLEDAVR        | 760.9 | 977.5 | 25.7 | y8 | light |
| TRIM28  | DHQYQFLEDAVR        | 760.9 | 849.4 | 25.7 | y7 | light |
| TRIM28  | DHQYQFLEDAVR        | 760.9 | 702.4 | 25.7 | y6 | light |
| TRIM28  | DHQYQFLEDAVR        | 765.9 | 987.5 | 25.7 | y8 | heavy |
| TRIM28  | DHQYQFLEDAVR        | 765.9 | 859.5 | 25.7 | y7 | heavy |
| TRIM28  | DHQYQFLEDAVR        | 765.9 | 712.4 | 25.7 | y6 | heavy |
| ZFP326  | ESVLTATSILNNPIVK    | 850.0 | 797.5 | 28.4 | y7 | light |
| ZFP326  | ESVLTATSILNNPIVK    | 850.0 | 684.4 | 28.4 | y6 | light |
| ZFP326  | ESVLTATSILNNPIVK    | 850.0 | 456.3 | 28.4 | y4 | light |
| ZFP326  | ESVLTATSILNNPIVK    | 854.0 | 805.5 | 28.4 | y7 | heavy |
| ZFP326  | ESVLTATSILNNPIVK    | 854.0 | 692.4 | 28.4 | y6 | heavy |
| ZFP326  | ESVLTATSILNNPIVK    | 854.0 | 464.3 | 28.4 | y4 | heavy |
| ZFP326  | NQGGSSWEAPYSR*      | 719.8 | 722.3 | 24.5 | y6 | light |
| ZFP326  | NQGGSSWEAPYSR*      | 719.8 | 593.3 | 24.5 | y5 | light |
| ZFP326  | NQGGSSWEAPYSR*      | 719.8 | 522.3 | 24.5 | y4 | light |
| ZFP326  | NQGGSSWEAPYSR*      | 724.8 | 732.4 | 24.5 | y6 | heavy |
| ZFP326  | NQGGSSWEAPYSR*      | 724.8 | 603.3 | 24.5 | y5 | heavy |
| ZFP326  | NQGGSSWEAPYSR*      | 724.8 | 532.3 | 24.5 | y4 | heavy |

|        |                  |       |        |      |    |       |
|--------|------------------|-------|--------|------|----|-------|
| AEBP1  | TPSQEQLLAEALAAAR | 834.9 | 772.4  | 28   | y8 | light |
| AEBP1  | TPSQEQLLAEALAAAR | 834.9 | 701.4  | 28   | y7 | light |
| AEBP1  | TPSQEQLLAEALAAAR | 840.0 | 782.4  | 28   | y8 | heavy |
| AEBP1  | TPSQEQLLAEALAAAR | 840.0 | 711.4  | 28   | y7 | heavy |
| AEBP1  | YLSPDATVSTEVR*   | 719.4 | 791.4  | 24.5 | y7 | light |
| AEBP1  | YLSPDATVSTEVR*   | 719.4 | 690.4  | 24.5 | y6 | light |
| AEBP1  | YLSPDATVSTEVR*   | 719.4 | 591.3  | 24.5 | y5 | light |
| AEBP1  | YLSPDATVSTEVR*   | 724.4 | 801.4  | 24.5 | y7 | heavy |
| AEBP1  | YLSPDATVSTEVR*   | 724.4 | 700.4  | 24.5 | y6 | heavy |
| AEBP1  | YLSPDATVSTEVR*   | 724.4 | 601.3  | 24.5 | y5 | heavy |
| AKAP8  | GGISSGGEGVQDR    | 609.8 | 904.4  | 21.2 | y9 | light |
| AKAP8  | GGISSGGEGVQDR    | 609.8 | 817.4  | 21.2 | y8 | light |
| AKAP8  | GGISSGGEGVQDR    | 609.8 | 574.3  | 21.2 | y5 | light |
| AKAP8  | GGISSGGEGVQDR    | 614.8 | 914.4  | 21.2 | y9 | heavy |
| AKAP8  | GGISSGGEGVQDR    | 614.8 | 827.4  | 21.2 | y8 | heavy |
| AKAP8  | GGISSGGEGVQDR    | 614.8 | 584.3  | 21.2 | y5 | heavy |
| AKAP8  | LLEEQTCEAASETR*  | 818.9 | 1024.4 | 27.5 | y9 | light |
| AKAP8  | LLEEQTCEAASETR*  | 818.9 | 563.3  | 27.5 | y5 | light |
| AKAP8  | LLEEQTCEAASETR*  | 818.9 | 492.2  | 27.5 | y4 | light |
| AKAP8  | LLEEQTCEAASETR*  | 823.9 | 1034.4 | 27.5 | y9 | heavy |
| AKAP8  | LLEEQTCEAASETR*  | 823.9 | 573.3  | 27.5 | y5 | heavy |
| AKAP8  | LLEEQTCEAASETR*  | 823.9 | 502.2  | 27.5 | y4 | heavy |
| CTNNB1 | MMVCQVGGIEALVR   | 781.9 | 913.5  | 26.4 | y9 | light |
| CTNNB1 | MMVCQVGGIEALVR   | 781.9 | 814.5  | 26.4 | y8 | light |
| CTNNB1 | MMVCQVGGIEALVR   | 781.9 | 757.5  | 26.4 | y7 | light |
| CTNNB1 | MMVCQVGGIEALVR   | 786.9 | 923.6  | 26.4 | y9 | heavy |
| CTNNB1 | MMVCQVGGIEALVR   | 786.9 | 824.5  | 26.4 | y8 | heavy |
| CTNNB1 | MMVCQVGGIEALVR   | 786.9 | 767.5  | 26.4 | y7 | heavy |
| CTNNB1 | QDVYGPQPQVR      | 643.8 | 781.4  | 22.2 | y7 | light |
| CTNNB1 | QDVYGPQPQVR      | 643.8 | 724.4  | 22.2 | y6 | light |
| CTNNB1 | QDVYGPQPQVR      | 643.8 | 499.3  | 22.2 | y4 | light |
| CTNNB1 | QDVYGPQPQVR      | 648.8 | 791.4  | 22.2 | y7 | heavy |
| CTNNB1 | QDVYGPQPQVR      | 648.8 | 734.4  | 22.2 | y6 | heavy |
| CTNNB1 | QDVYGPQPQVR      | 648.8 | 509.3  | 22.2 | y4 | heavy |
| CTNNB1 | SDFQVNLNNASR     | 682.8 | 887.5  | 23.4 | y8 | light |
| CTNNB1 | SDFQVNLNNASR     | 682.8 | 788.4  | 23.4 | y7 | light |
| CTNNB1 | SDFQVNLNNASR     | 682.8 | 561.3  | 23.4 | y5 | light |
| CTNNB1 | SDFQVNLNNASR     | 687.8 | 897.5  | 23.4 | y8 | heavy |
| CTNNB1 | SDFQVNLNNASR     | 687.8 | 798.4  | 23.4 | y7 | heavy |
| CTNNB1 | SDFQVNLNNASR     | 687.8 | 571.3  | 23.4 | y5 | heavy |
| EMERIN | IFEYETQR         | 543.3 | 972.4  | 19.2 | y7 | light |

|        |               |       |       |      |    |       |
|--------|---------------|-------|-------|------|----|-------|
| EMERIN | IFEYETQR      | 543.3 | 825.4 | 19.2 | y6 | light |
| EMERIN | IFEYETQR      | 543.3 | 696.3 | 19.2 | y5 | light |
| EMERIN | IFEYETQR      | 548.3 | 982.5 | 19.2 | y7 | heavy |
| EMERIN | IFEYETQR      | 548.3 | 835.4 | 19.2 | y6 | heavy |
| EMERIN | IFEYETQR      | 548.3 | 706.3 | 19.2 | y5 | heavy |
| EMERIN | TYGEPESVGMSK* | 642.8 | 834.4 | 22.2 | y8 | light |
| EMERIN | TYGEPESVGMSK* | 642.8 | 608.3 | 22.2 | y6 | light |
| EMERIN | TYGEPESVGMSK* | 642.8 | 422.2 | 22.2 | y4 | light |
| EMERIN | TYGEPESVGMSK* | 646.8 | 842.4 | 22.2 | y8 | heavy |
| EMERIN | TYGEPESVGMSK* | 646.8 | 616.3 | 22.2 | y6 | heavy |
| EMERIN | TYGEPESVGMSK* | 646.8 | 430.2 | 22.2 | y4 | heavy |
| RAD50  | ILELDQELTK    | 601.3 | 733.4 | 20.9 | y6 | light |
| RAD50  | ILELDQELTK    | 601.3 | 618.3 | 20.9 | y5 | light |
| RAD50  | ILELDQELTK    | 601.3 | 490.3 | 20.9 | y4 | light |
| RAD50  | ILELDQELTK    | 605.3 | 741.4 | 20.9 | y6 | heavy |
| RAD50  | ILELDQELTK    | 605.3 | 626.4 | 20.9 | y5 | heavy |
| RAD50  | ILELDQELTK    | 605.3 | 498.3 | 20.9 | y4 | heavy |
| RAD50  | LIQDQQEQIQHLK | 810.9 | 895.5 | 27.2 | y7 | light |
| RAD50  | LIQDQQEQIQHLK | 810.9 | 638.4 | 27.2 | y5 | light |
| RAD50  | LIQDQQEQIQHLK | 810.9 | 525.3 | 27.2 | y4 | light |
| RAD50  | LIQDQQEQIQHLK | 814.9 | 903.5 | 27.2 | y7 | heavy |
| RAD50  | LIQDQQEQIQHLK | 814.9 | 646.4 | 27.2 | y5 | heavy |
| RAD50  | LIQDQQEQIQHLK | 814.9 | 533.3 | 27.2 | y4 | heavy |
| RAD50  | SELQQLEGSSDR* | 674.8 | 763.4 | 23.1 | y7 | light |
| RAD50  | SELQQLEGSSDR* | 674.8 | 650.3 | 23.1 | y6 | light |
| RAD50  | SELQQLEGSSDR* | 674.8 | 521.2 | 23.1 | y5 | light |
| RAD50  | SELQQLEGSSDR* | 679.8 | 773.4 | 23.1 | y7 | heavy |
| RAD50  | SELQQLEGSSDR* | 679.8 | 660.3 | 23.1 | y6 | heavy |
| RAD50  | SELQQLEGSSDR* | 679.8 | 531.2 | 23.1 | y5 | heavy |
| RAD50  | VCLTDVTIMER   | 668.8 | 863.4 | 23   | y7 | light |
| RAD50  | VCLTDVTIMER   | 668.8 | 748.4 | 23   | y6 | light |
| RAD50  | VCLTDVTIMER   | 668.8 | 649.3 | 23   | y5 | light |
| RAD50  | VCLTDVTIMER   | 673.8 | 873.4 | 23   | y7 | heavy |
| RAD50  | VCLTDVTIMER   | 673.8 | 758.4 | 23   | y6 | heavy |
| RAD50  | VCLTDVTIMER   | 673.8 | 659.3 | 23   | y5 | heavy |
| RUNX2  | GTGLPAITDVPR* | 598.8 | 700.4 | 20.9 | y6 | light |
| RUNX2  | GTGLPAITDVPR* | 598.8 | 771.4 | 20.9 | y7 | light |
| RUNX2  | GTGLPAITDVPR* | 598.8 | 868.5 | 20.9 | y8 | light |
| RUNX2  | GTGLPAITDVPR* | 598.8 | 710.4 | 20.9 | y6 | heavy |
| RUNX2  | GTGLPAITDVPR* | 598.8 | 781.4 | 20.9 | y7 | heavy |
| RUNX2  | GTGLPAITDVPR* | 603.8 | 878.5 | 20.9 | y8 | heavy |

|        |                   |       |        |      |     |       |
|--------|-------------------|-------|--------|------|-----|-------|
| RUVBL1 | AVLLAGPPGTGK      | 540.8 | 684.4  | 19.1 | y8  | light |
| RUVBL1 | AVLLAGPPGTGK      | 540.8 | 613.3  | 19.1 | y7  | light |
| RUVBL1 | AVLLAGPPGTGK      | 540.8 | 556.3  | 19.1 | y6  | light |
| RUVBL1 | AVLLAGPPGTGK      | 544.8 | 692.4  | 19.1 | y8  | heavy |
| RUVBL1 | AVLLAGPPGTGK      | 544.8 | 621.3  | 19.1 | y7  | heavy |
| RUVBL1 | AVLLAGPPGTGK      | 544.8 | 564.3  | 19.1 | y6  | heavy |
| RUVBL1 | EACGVIVELIK       | 615.8 | 714.5  | 21.4 | y6  | light |
| RUVBL1 | EACGVIVELIK       | 615.8 | 601.4  | 21.4 | y5  | light |
| RUVBL1 | EACGVIVELIK       | 615.8 | 502.3  | 21.4 | y4  | light |
| RUVBL1 | EACGVIVELIK       | 619.8 | 722.5  | 21.4 | y6  | heavy |
| RUVBL1 | EACGVIVELIK       | 619.8 | 609.4  | 21.4 | y5  | heavy |
| RUVBL1 | EACGVIVELIK       | 619.8 | 510.3  | 21.4 | y4  | heavy |
| RUVBL1 | QAASGLVGQENAR*    | 650.8 | 943.5  | 22.4 | y9  | light |
| RUVBL1 | QAASGLVGQENAR*    | 650.8 | 773.4  | 22.4 | y7  | light |
| RUVBL1 | QAASGLVGQENAR*    | 650.8 | 674.3  | 22.4 | y6  | light |
| RUVBL1 | QAASGLVGQENAR*    | 655.8 | 953.5  | 22.4 | y9  | heavy |
| RUVBL1 | QAASGLVGQENAR*    | 655.8 | 783.4  | 22.4 | y7  | heavy |
| RUVBL1 | QAASGLVGQENAR*    | 655.8 | 684.3  | 22.4 | y6  | heavy |
| RUVBL1 | TALALIAQELGSK     | 693.4 | 916.5  | 23.7 | y9  | light |
| RUVBL1 | TALALIAQELGSK     | 693.4 | 845.5  | 23.7 | y8  | light |
| RUVBL1 | TALALIAQELGSK     | 693.4 | 732.4  | 23.7 | y7  | light |
| RUVBL1 | TALALIAQELGSK     | 697.4 | 924.5  | 23.7 | y9  | heavy |
| RUVBL1 | TALALIAQELGSK     | 697.4 | 853.5  | 23.7 | y8  | heavy |
| RUVBL1 | TALALIAQELGSK     | 697.4 | 740.4  | 23.7 | y7  | heavy |
| RUVBL1 | VPFCPMVGSEVYSTEIK | 972.0 | 1439.7 | 32.1 | y13 | light |
| RUVBL1 | VPFCPMVGSEVYSTEIK | 972.0 | 1112.5 | 32.1 | y10 | light |
| RUVBL1 | VPFCPMVGSEVYSTEIK | 972.0 | 577.3  | 32.1 | y5  | light |
| RUVBL1 | VPFCPMVGSEVYSTEIK | 976.0 | 1447.7 | 32.1 | y13 | heavy |
| RUVBL1 | VPFCPMVGSEVYSTEIK | 976.0 | 1120.6 | 32.1 | y10 | heavy |
| RUVBL1 | VPFCPMVGSEVYSTEIK | 976.0 | 585.3  | 32.1 | y5  | heavy |
| LPIN1  | GHNTGEQPAQLGLATR* | 825.4 | 926.5  | 27.7 | y9  | light |
| LPIN1  | GHNTGEQPAQLGLATR* | 825.4 | 630.4  | 27.7 | y6  | light |
| LPIN1  | GHNTGEQPAQLGLATR* | 825.4 | 517.3  | 27.7 | y5  | light |
| LPIN1  | GHNTGEQPAQLGLATR* | 830.4 | 936.6  | 27.7 | y9  | heavy |
| LPIN1  | GHNTGEQPAQLGLATR* | 830.4 | 640.4  | 27.7 | y6  | heavy |
| LPIN1  | GHNTGEQPAQLGLATR* | 830.4 | 527.3  | 27.7 | y5  | heavy |
| RUVBL2 | LLIVSTSPYSEK      | 668.9 | 898.4  | 23   | y8  | light |
| RUVBL2 | LLIVSTSPYSEK      | 668.9 | 811.4  | 23   | y7  | light |
| RUVBL2 | LLIVSTSPYSEK      | 668.9 | 623.3  | 23   | y5  | light |
| RUVBL2 | LLIVSTSPYSEK      | 672.9 | 906.4  | 23   | y8  | heavy |
| RUVBL2 | LLIVSTSPYSEK      | 672.9 | 819.4  | 23   | y7  | heavy |

|        |                  |       |        |      |     |       |
|--------|------------------|-------|--------|------|-----|-------|
| RUVBL2 | LLIVSTSPYSEK     | 672.9 | 631.3  | 23   | y5  | heavy |
| RUVBL2 | TQGFLALFSGDTGEIK | 842.4 | 1137.6 | 28.2 | y11 | light |
| RUVBL2 | TQGFLALFSGDTGEIK | 842.4 | 953.5  | 28.2 | y9  | light |
| RUVBL2 | TQGFLALFSGDTGEIK | 842.4 | 806.4  | 28.2 | y8  | light |
| RUVBL2 | TQGFLALFSGDTGEIK | 846.4 | 1145.6 | 28.2 | y11 | heavy |
| RUVBL2 | TQGFLALFSGDTGEIK | 846.4 | 961.5  | 28.2 | y9  | heavy |
| RUVBL2 | TQGFLALFSGDTGEIK | 846.4 | 814.4  | 28.2 | y8  | heavy |
| RUVBL2 | VYSLFLDESR*      | 614.8 | 766.4  | 21.3 | y6  | light |
| RUVBL2 | VYSLFLDESR*      | 614.8 | 619.3  | 21.3 | y5  | light |
| RUVBL2 | VYSLFLDESR*      | 614.8 | 506.2  | 21.3 | y4  | light |
| RUVBL2 | VYSLFLDESR*      | 619.8 | 776.4  | 21.3 | y6  | heavy |
| RUVBL2 | VYSLFLDESR*      | 619.8 | 629.3  | 21.3 | y5  | heavy |
| RUVBL2 | VYSLFLDESR*      | 619.8 | 516.2  | 21.3 | y4  | heavy |
| WDR5   | YILAATLDNTLK     | 668.4 | 875.5  | 23   | y8  | light |
| WDR5   | YILAATLDNTLK     | 668.4 | 804.4  | 23   | y7  | light |
| WDR5   | YILAATLDNTLK     | 668.4 | 703.4  | 23   | y6  | light |
| WDR5   | YILAATLDNTLK     | 672.4 | 883.5  | 23   | y8  | heavy |
| WDR5   | YILAATLDNTLK     | 672.4 | 812.5  | 23   | y7  | heavy |
| WDR5   | YILAATLDNTLK     | 672.4 | 711.4  | 23   | y6  | heavy |
| WDR5   | TLIDDDNPPVSFVK*  | 780.4 | 887.5  | 26.3 | y8  | light |
| WDR5   | TLIDDDNPPVSFVK*  | 780.4 | 773.5  | 26.3 | y7  | light |
| WDR5   | TLIDDDNPPVSFVK*  | 780.4 | 480.3  | 26.3 | y4  | light |
| WDR5   | TLIDDDNPPVSFVK*  | 784.4 | 895.5  | 26.3 | y8  | heavy |
| WDR5   | TLIDDDNPPVSFVK*  | 784.4 | 781.5  | 26.3 | y7  | heavy |
| WDR5   | TLIDDDNPPVSFVK*  | 784.4 | 488.3  | 26.3 | y4  | heavy |
| NFIL3  | FIATQPISASDSR    | 696.9 | 960.5  | 23.8 | y9  | light |
| NFIL3  | FIATQPISASDSR    | 696.9 | 832.4  | 23.8 | y8  | light |
| NFIL3  | FIATQPISASDSR    | 696.9 | 735.4  | 23.8 | y7  | light |
| NFIL3  | FIATQPISASDSR    | 701.9 | 970.5  | 23.8 | y9  | heavy |
| NFIL3  | FIATQPISASDSR    | 701.9 | 842.4  | 23.8 | y8  | heavy |
| NFIL3  | FIATQPISASDSR    | 701.9 | 745.4  | 23.8 | y7  | heavy |
| NFIL3  | LIALGEENATLK     | 636.4 | 974.5  | 22   | y9  | light |
| NFIL3  | LIALGEENATLK     | 636.4 | 861.4  | 22   | y8  | light |
| NFIL3  | LIALGEENATLK     | 636.4 | 804.4  | 22   | y7  | light |
| NFIL3  | LIALGEENATLK     | 640.4 | 982.5  | 22   | y9  | heavy |
| NFIL3  | LIALGEENATLK     | 640.4 | 869.4  | 22   | y8  | heavy |
| NFIL3  | LIALGEENATLK     | 640.4 | 812.4  | 22   | y7  | heavy |
| NFIL3  | QEPVELESFAR*     | 652.8 | 1047.5 | 22.5 | y9  | light |
| NFIL3  | QEPVELESFAR*     | 652.8 | 851.4  | 22.5 | y7  | light |
| NFIL3  | QEPVELESFAR*     | 652.8 | 722.4  | 22.5 | y6  | light |
| NFIL3  | QEPVELESFAR*     | 657.8 | 1057.6 | 22.5 | y9  | heavy |



|         |                      |       |        |      |     |       |
|---------|----------------------|-------|--------|------|-----|-------|
| NFIL3   | QEPVELESFAR*         | 657.8 | 861.4  | 22.5 | y7  | heavy |
| NFIL3   | QEPVELESFAR*         | 657.8 | 732.4  | 22.5 | y6  | heavy |
| FOXK1   | TPFGPLSSR*           | 481.3 | 763.4  | 17.3 | y7  | light |
| FOXK1   | TPFGPLSSR*           | 481.3 | 616.3  | 17.3 | y6  | light |
| FOXK1   | TPFGPLSSR*           | 481.3 | 559.3  | 17.3 | y5  | light |
| FOXK1   | TPFGPLSSR*           | 486.3 | 773.4  | 17.3 | y7  | heavy |
| FOXK1   | TPFGPLSSR*           | 486.3 | 626.3  | 17.3 | y6  | heavy |
| FOXK1   | TPFGPLSSR*           | 486.3 | 569.3  | 17.3 | y5  | heavy |
| SIRT2   | NLFTQTLGLGSQK*       | 703.9 | 589.3  | 24   | y6  | light |
| SIRT2   | NLFTQTLGLGSQK*       | 703.9 | 532.3  | 24   | y5  | light |
| SIRT2   | NLFTQTLGLGSQK*       | 707.9 | 597.3  | 24   | y6  | heavy |
| SIRT2   | NLFTQTLGLGSQK*       | 707.9 | 540.3  | 24   | y5  | heavy |
| BRD8    | SSAAGDIGEADGSSGK*    | 704.8 | 1092.5 | 24   | y12 | light |
| BRD8    | SSAAGDIGEADGSSGK*    | 704.8 | 621.3  | 24   | y7  | light |
| BRD8    | SSAAGDIGEADGSSGK*    | 704.8 | 435.2  | 24   | y5  | light |
| BRD8    | SSAAGDIGEADGSSGK*    | 708.8 | 1100.5 | 24   | y12 | heavy |
| BRD8    | SSAAGDIGEADGSSGK*    | 708.8 | 629.3  | 24   | y7  | heavy |
| BRD8    | SSAAGDIGEADGSSGK*    | 708.8 | 443.2  | 24   | y5  | heavy |
| FABP4   | EVGVPFATR            | 468.3 | 707.4  | 17   | y7  | light |
| FABP4   | EVGVPFATR            | 468.3 | 551.3  | 17   | y5  | light |
| FABP4   | EVGVPFATR            | 468.3 | 494.3  | 17   | y4  | light |
| FABP4   | EVGVPFATR            | 473.3 | 717.4  | 17   | y7  | heavy |
| FABP4   | EVGVPFATR            | 473.3 | 561.3  | 17   | y5  | heavy |
| FABP4   | EVGVPFATR            | 473.3 | 504.3  | 17   | y4  | heavy |
| FABP4   | LVSSNFDDYMK*         | 724.3 | 932.4  | 24.6 | y7  | light |
| FABP4   | LVSSNFDDYMK*         | 724.3 | 818.3  | 24.6 | y6  | light |
| FABP4   | LVSSNFDDYMK*         | 724.3 | 671.3  | 24.6 | y5  | light |
| FABP4   | LVSSNFDDYMK*         | 728.3 | 940.4  | 24.6 | y7  | heavy |
| FABP4   | LVSSNFDDYMK*         | 728.3 | 826.4  | 24.6 | y6  | heavy |
| FABP4   | LVSSNFDDYMK*         | 728.3 | 679.3  | 24.6 | y5  | heavy |
| SMARCC1 | TLAGLVVQLLQFQEDAFGK* | 693.0 | 941.4  | 28.6 | y8  | light |
| SMARCC1 | TLAGLVVQLLQFQEDAFGK* | 693.0 | 794.4  | 28.6 | y7  | light |
| SMARCC1 | TLAGLVVQLLQFQEDAFGK* | 693.0 | 537.3  | 28.6 | y5  | light |
| SMARCC1 | TLAGLVVQLLQFQEDAFGK* | 695.7 | 949.5  | 28.6 | y8  | heavy |
| SMARCC1 | TLAGLVVQLLQFQEDAFGK* | 695.7 | 802.4  | 28.6 | y7  | heavy |
| SMARCC1 | TLAGLVVQLLQFQEDAFGK* | 695.7 | 545.3  | 28.6 | y5  | heavy |
| SF3B3   | LGAVFNQVAFPLQYTPR*   | 961.0 | 1092.6 | 31.7 | y9  | light |
| SF3B3   | LGAVFNQVAFPLQYTPR*   | 961.0 | 1021.5 | 31.7 | y8  | light |
| SF3B3   | LGAVFNQVAFPLQYTPR*   | 961.0 | 874.5  | 31.7 | y7  | light |
| SF3B3   | LGAVFNQVAFPLQYTPR*   | 966.0 | 1102.6 | 31.7 | y9  | heavy |
| SF3B3   | LGAVFNQVAFPLQYTPR*   | 966.0 | 1031.6 | 31.7 | y8  | heavy |

|           |                    |       |       |      |    |       |
|-----------|--------------------|-------|-------|------|----|-------|
| SF3B3     | LGAVFNQVAFPLQYTPR* | 966.0 | 884.5 | 31.7 | y7 | heavy |
| SF3B3     | AVMISAIEK          | 481.3 | 791.4 | 17.3 | y7 | light |
| SF3B3     | AVMISAIEK          | 481.3 | 660.4 | 17.3 | y6 | light |
| SF3B3     | AVMISAIEK          | 481.3 | 547.3 | 17.3 | y5 | light |
| SF3B3     | AVMISAIEK          | 485.3 | 799.4 | 17.3 | y7 | heavy |
| SF3B3     | AVMISAIEK          | 485.3 | 668.4 | 17.3 | y6 | heavy |
| SF3B3     | AVMISAIEK          | 485.3 | 555.3 | 17.3 | y5 | heavy |
| SF3B3     | DYIVVGSDSGR*       | 584.3 | 677.3 | 20.4 | y7 | light |
| SF3B3     | DYIVVGSDSGR*       | 584.3 | 578.3 | 20.4 | y6 | light |
| SF3B3     | DYIVVGSDSGR*       | 589.3 | 687.3 | 20.4 | y7 | heavy |
| SF3B3     | DYIVVGSDSGR*       | 589.3 | 588.3 | 20.4 | y6 | heavy |
| HNRNPA2B1 | GFGFVTFDDHDPVDK    | 565.9 | 825.4 | 23.8 | y7 | light |
| HNRNPA2B1 | GFGFVTFDDHDPVDK    | 565.9 | 458.3 | 23.8 | y4 | light |
| HNRNPA2B1 | GFGFVTFDDHDPVDK    | 568.6 | 833.4 | 23.8 | y7 | heavy |
| HNRNPA2B1 | GFGFVTFDDHDPVDK    | 568.6 | 466.3 | 23.8 | y4 | heavy |
| HNRNPA2B1 | GGNFGFGDSR*        | 507.2 | 638.3 | 18.1 | y6 | light |
| HNRNPA2B1 | GGNFGFGDSR*        | 507.2 | 581.3 | 18.1 | y5 | light |
| HNRNPA2B1 | GGNFGFGDSR*        | 512.2 | 648.3 | 18.1 | y6 | heavy |
| HNRNPA2B1 | GGNFGFGDSR*        | 512.2 | 591.3 | 18.1 | y5 | heavy |
| HNRNPA2B1 | GGGGNFGPGPSNFR     | 689.3 | 888.4 | 23.6 | y9 | light |
| HNRNPA2B1 | GGGGNFGPGPSNFR     | 689.3 | 831.4 | 23.6 | y8 | light |
| HNRNPA2B1 | GGGGNFGPGPSNFR     | 694.3 | 898.4 | 23.6 | y9 | heavy |
| HNRNPA2B1 | GGGGNFGPGPSNFR     | 694.3 | 841.4 | 23.6 | y8 | heavy |
| HNRNPAB   | IFVGGLNPEATEEK*    | 752.4 | 917.4 | 25.5 | y8 | light |
| HNRNPAB   | IFVGGLNPEATEEK*    | 752.4 | 803.4 | 25.5 | y7 | light |
| HNRNPAB   | IFVGGLNPEATEEK*    | 756.4 | 925.4 | 25.5 | y8 | heavy |
| HNRNPAB   | IFVGGLNPEATEEK*    | 756.4 | 811.4 | 25.5 | y7 | heavy |
| HNRNPAB   | EVYQQQQYGSGGR      | 750.3 | 980.5 | 25.4 | y9 | light |
| HNRNPAB   | EVYQQQQYGSGGR      | 750.3 | 852.4 | 25.4 | y8 | light |
| HNRNPAB   | EVYQQQQYGSGGR      | 755.4 | 990.5 | 25.4 | y9 | heavy |
| HNRNPAB   | EVYQQQQYGSGGR      | 755.4 | 862.4 | 25.4 | y8 | heavy |

**Table S3: Primers used to make siRNA**

|    | Gene     | NP number    | First primer Forward      | First primer Backward            | Nested primer Forward                             | Nested primer Backward                              |
|----|----------|--------------|---------------------------|----------------------------------|---------------------------------------------------|-----------------------------------------------------|
| 1  | Pparg    | NP_035276    | tccgaattttca<br>agggtgcc  | caagtccttgta<br>gatctcctg        | gcgtaatacgactcact<br>atagggttctgatccgta<br>gaagcc | gcgtaatacgactcac<br>tatagggtgaaggctc<br>atgtctgtc   |
| 2  | C/ebpa   | NP_031704    | cccacttgcaagt<br>ccagatc  | gaaaccatcct<br>ctgggtctc         | gcgtaatacgactcact<br>ataggagaccaccatgc<br>acctac  | gcgtaatacgactcac<br>tataggcaaggcggtc<br>ccgcag      |
| 3  | C/EBPβ   | NP_034013    | actacggttacgt<br>gagcctc  | ggcagctgctt<br>gaacaagttc        | gcgtaatacgactcact<br>atagggccgcccgcctg<br>cttc    | gcgtaatacgactcac<br>tataggagctgtcca<br>ccttcttc     |
| 4  | C/ebpz 1 | NP_001019977 | aagacgacaact<br>gcttccac  | ttcctctgccgtt<br>tgggtttc        | gcgtaatacgactcact<br>atagggccagcaatag<br>aaaaaagc | gcgtaatacgactcac<br>tataggggggctttcat<br>cttcttcc   |
|    | C/ebpz 2 | NP_001019977 | cagaagatccgg<br>atgaggaa  | ccagggtttgt<br>acttgagc          | gcgtaatacgactcact<br>atagggcgatgagggc<br>aagaatg  | gcgtaatacgactcac<br>tataggcttgacacg<br>acatctggag   |
| 5  | Fabp4 1  | NP_077717    | gtgtgatgccttt<br>gtgggaac | aaactcttgagg<br>aagtcacgc        | gcgtaatacgactcact<br>atagggtgaagcttct<br>ccagtg   | gcgtaatacgactcac<br>tataggaacacattcc<br>accaccagc   |
|    | Fabp4 2  | NP_077717    | ccgagatttcctt<br>caaactgg | ccatatccaat<br>aaaatgcatctt<br>c | gcgtaatacgactcact<br>ataggcgatgaaatcac<br>cgcagac | gcgtaatacgactcac<br>tataggtaattgcttgc<br>ttattagtgg |
| 6  | Foxk1    | NP_951031    | aacgggtacatc<br>ctggctag  | tgccatagctgt<br>gggctgtg         | gcgtaatacgactcact<br>ataggacgacacagca<br>ggcacag  | gcgtaatacgactcac<br>tataggctaccggg<br>acctcttg      |
| 7  | Mybbp1a  | NP_058056    | gccaaaggatatt<br>cctagtgc | ctggccactctc<br>cttttctg         | gcgtaatacgactcact<br>ataggcaaagcggaag<br>aaaaaggg | gcgtaatacgactcac<br>tataggaccctactct<br>gtaacagg    |
| 8  | Sirt2    | NP_001116238 | cacatcacactgt<br>gtcaacac | gctgttctcttt<br>ctctttgg         | gcgtaatacgactcact<br>ataggagaatacacgat<br>gggctgg | gcgtaatacgactcac<br>tatagggactttccag<br>gggagatg    |
| 9  | Csrp1    | NP_031817    | aggcaagaaatg<br>tgggtatg  | tcactctgagtg<br>aaccaaggc        | gcgtaatacgactcact<br>atagggacggtctacttt<br>gctgag | gcgtaatacgactcac<br>tataggccctgtccaa<br>agccaaaac   |
| 10 | Brd8     | NP_084423    | agttttccgtgtg<br>cagtgaag | tatctgcttcaa<br>tggcacagc        | gcgtaatacgactcact<br>ataggcaagaagcaatt<br>caggctc | gcgtaatacgactcac<br>tatagggtgttccccca<br>tcaaagag   |
| 11 | Wdr5     | NP_543124    | aactcaaccccc<br>agtccaac  | ttagcagtcact<br>cttccacag        | gcgtaatacgactcact<br>ataggagtgtgaggata<br>tgggacg | gcgtaatacgactcac<br>tatagggtgtcttctct<br>aacgctgc   |
| 12 | Eef1a1   | NP_034236    | gtggagactggt<br>gttctcaag | ttagccttctga<br>gcttctg          | gcgtaatacgactcact<br>ataggggcatggtggtt<br>accttg  | Gcgtaatacgactcac<br>tatagggcagacttgg<br>tgactttgc   |

|    |           |              |                            |                            |                                                      |                                                       |
|----|-----------|--------------|----------------------------|----------------------------|------------------------------------------------------|-------------------------------------------------------|
| 13 | Flna 1    | NP_034357    | tgtgaacacaag<br>caatgcagg  | agggtaccata<br>atgcggtatg  | gcgtaatacgcactcact<br>atagggccctttcggtta<br>ccattg   | gcgtaatacgcactcac<br>tataggtgcctgggat<br>atgctcatc    |
|    | Flna 2    | NP_034357    | ggcagtcctttt<br>ctgtgaa    | tgtgctcctcgt<br>tgaacttg   | gcgtaatacgcactcact<br>ataggggccgggtgaa<br>agagagtat  | gcgtaatacgcactcac<br>tataggtgtgctcctcg<br>ttgaacttg   |
|    | Flna 3    | NP_034357    | gagctgacaaca<br>gcgtggta   | aggtaatgggtg<br>tgtgtgccca | gcgtaatacgcactcact<br>ataggtgtacctggcag<br>tccctttc  | gcgtaatacgcactcac<br>tataggaggtaatgggt<br>gtgtgtgccca |
| 14 | Foxc2     | NP_038547    | accgctggcact<br>gccatac    | ttggtgcagtcg<br>taagagtag  | gcgtaatacgcactcact<br>atagggcttacacgcag<br>ccgtg     | gcgtaatacgcactcac<br>tatagggacggcgtag<br>ctcgatag     |
| 15 | Apex1     | NP_033817    | cagctccgtcag<br>acaagaag   | cacagtgctag<br>gtaaagggtg  | gcgtaatacgcactcact<br>ataggtggtgtgggct<br>actttc     | gcgtaatacgcactcac<br>tataggatgggacagt<br>ggctactg     |
| 16 | Smarca5   | NP_444354    | tcaaggctaatag<br>agaagtggg | gcttctttttct<br>tccacggc   | gcgtaatacgcactcact<br>ataggtagccagagaa<br>gtagaagg   | gcgtaatacgcactcac<br>tataggacctcatct<br>tacgtttc      |
| 17 | Smarca4   | NP_001122316 | agaaactctccc<br>ctaaccac   | agtcttcttcgc<br>tgccacttc  | gcgtaatacgcactcact<br>ataggggaagattgtgga<br>tgccgtg  | gcgtaatacgcactcac<br>tataggtcctctgtgtcc<br>tcctcac    |
| 18 | Smarcd2   | NP_001123659 | caggcactgtgg<br>ctttacatc  | ttaggtcaggc<br>gaattcccag  | gcgtaatacgcactcact<br>ataggaacacaacca<br>gctgcagg    | gcgtaatacgcactcac<br>tataggtgttccagttc<br>ctgccttc    |
| 19 | Smarcc1   | NP_033237    | cgacatttgaag<br>agctggag   | accccatctgc<br>aggaggag    | gcgtaatacgcactcact<br>ataggtggacagagag<br>aaagaggc   | gcgtaatacgcactcac<br>tataggtggtggagga<br>ggatacatg    |
| 20 | Smarcc2   | NP_937803    | aactccgacattt<br>tgaggagc  | tactgtggag<br>gtggcacag    | gcgtaatacgcactcact<br>ataggggagacaataat<br>ggaccgg   | gcgtaatacgcactcac<br>tataggtgactgtgcct<br>gggcttg     |
| 21 | Cstf3     | NP_663504    | aggaaacagctt<br>tactggtgg  | tcatcgtattcg<br>cttctgctg  | gcgtaatacgcactcact<br>ataggtacccttgttctg<br>caagtg   | gcgtaatacgcactcac<br>tataggaatgtcatga<br>acagggggg    |
| 22 | Sf3b3     | NP_598714    | ctttgctgatgac<br>acctatcc  | aaggcatagcg<br>ggtcctaatag | gcgtaatacgcactcact<br>ataggcagccttctcga<br>ctatgac   | gcgtaatacgcactcac<br>tataggcctaagcttc<br>ttggacac     |
| 23 | Hnrnpa2b1 | NP_872591    | aggaagatactg<br>aggaacacc  | tatctgctccttc<br>caccatag  | gcgtaatacgcactcact<br>ataggaccttagagatt<br>actttgaag | gcgtaatacgcactcac<br>tataggacttctccag<br>gaccatag     |
| 24 | Sfrs1     | NP_001071635 | aacaacgactgc<br>cgcatctac  | gtgtataaccta<br>cctcgtgag  | gcgtaatacgcactcact<br>ataggaacctacctccg<br>gatatcc   | gcgtaatacgcactcac<br>tataggccagttttcga<br>actgcatac   |
| 25 | Hnrnpab   | NP_034578    | gtttggagagggt<br>gttgactg  | gttattctgatg<br>accaccacg  | gcgtaatacgcactcact<br>ataggatggatcccaac<br>actggac   | gcgtaatacgcactcac<br>tataggtgtactacc<br>tgacctcc      |
| 26 | Polr2h    | NP_663607    | tcgatgtgaaag<br>acatcgacc  | cagaaggccag<br>cttcttcac   | gcgtaatacgcactcact<br>ataggatttgaccgagt              | gcgtaatacgcactcac<br>tataggaactctgga                  |

|    |         |              |                            |                           |                                                     |                                                       |
|----|---------|--------------|----------------------------|---------------------------|-----------------------------------------------------|-------------------------------------------------------|
|    |         |              |                            |                           | atcccg                                              | gtccacctc                                             |
| 27 | Ubap2l  | NP_082751    | acgcagcagaca<br>ttcctgaac  | tattcaccaagc<br>tggtcatcg | gcgtaatacgactcact<br>ataggcctcctggctat<br>agttac    | gcgtaatacgactcac<br>tataggcgagagtgag<br>gatatcctg     |
| 28 | Nedd4   | NP_035020    | tttgacagaca<br>catcagcac   | ctaatcaacgc<br>catcaaagcc | gcgtaatacgactcact<br>ataggctgaaaaccgg<br>aggatcag   | gcgtaatacgactcac<br>tataggctgtgttct<br>caattgcc       |
| 29 | Ptbp1   | NP_032982    | gctgggaattctg<br>tcctttg   | agatggtggac<br>ttgaaaagg  | gcgtaatacgactcact<br>atagggtcagcaatctg<br>aacctg    | gcgtaatacgactcac<br>tatagggtcatggttg<br>tgcagttc      |
| 30 | Nono    | NP_075633    | gcactcattgag<br>atggagaag  | atatcggcggc<br>gtttattgg  | gcgtaatacgactcact<br>ataggcaacagcagga<br>tcaagtgg   | gcgtaatacgactcac<br>tatagggtaatgcagg<br>aggagtcc      |
| 31 | Nfil3   | NP_059069    | cactagcaactc<br>cccaagaac  | gagatcggtgtg<br>gtggctatg | gcgtaatacgactcact<br>atagggtgtagtgggca<br>agtcttc   | gcgtaatacgactcac<br>tataggatctcttgagc<br>gagaccac     |
| 32 | Creb1   | NP_034082    | gggtgccaagga<br>ttgaagaag  | gatttgtggcag<br>taaaggctc | gcgtaatacgactcact<br>ataggcagaagaggag<br>acttcagc   | gcgtaatacgactcac<br>tatagggtgcttttagc<br>tcctcaatc    |
| 33 | Smarce1 | NP_065643    | gtcggttgtcaca<br>acagctag  | actccttctctc<br>gtcttctg  | gcgtaatacgactcact<br>ataggcaggtccagtctt<br>taatgg   | gcgtaatacgactcac<br>tatagggtccagtggc<br>gctgttg       |
| 34 | Mgmt    | NP_032624    | tttggggaagat<br>ggagctgctc | gtcgactcgaa<br>ggatgacttg | gcgtaatacgactcact<br>ataggatgggatacgg<br>tgctcag    | gcgtaatacgactcac<br>tatagggtcccagtc<br>gaccaag        |
| 35 | Trim28  | NP_035718    | gacctggtcatgt<br>gtaaccag  | agagagctcct<br>gagaacttag | gcgtaatacgactcact<br>atagggtgcttcacctg<br>gattgc    | gcgtaatacgactcac<br>tatagggtcactgggaa<br>ggttcaatg    |
| 36 | Myh9    | NP_071855    | ataaacaccgac<br>ctgaacctg  | ctattcagctgc<br>cttggcatc | gcgtaatacgactcact<br>ataggagccacgcaca<br>gaagaatg   | gcgtaatacgactcac<br>tataggcatctgcttta<br>ccgtcgac     |
| 37 | Lpin1   | NP_001123884 | atthtggccacgc<br>tgggaaag  | caagctgaggc<br>tgaatgcatg | gcgtaatacgactcact<br>atagggtcaccaggat<br>tgcaaag    | gcgtaatacgactcac<br>tatagggtcaaaagg<br>ggcagtgcc      |
| 38 | Runx2   | NP_001139510 | tgcccaggcgtat<br>ttcagatg  | caatatggccg<br>ccaacagac  | gcgtaatacgactcact<br>ataggatgacactgcca<br>cctctg    | gcgtaatacgactcac<br>tatagggtcatccattct<br>gccgctag    |
| 39 | GL3     | NP_680372    |                            |                           | gcgtaatacgactcact<br>atagggtcggtcggtaaa<br>gttgttc  | gcgtaatacgactcac<br>tatagggtctgctcga<br>gttttccg      |
| 40 | Lac1    | NP_012917    |                            |                           | gcgtaatacgactcact<br>atagggtcgatggcgg<br>agctgaat   | gcgtaatacgactcac<br>tatagggtcagacgcgc<br>cgagacagaa   |
| 41 | Gus1    | NP_200933    |                            |                           | gcgtaatacgactcact<br>atagggtctctgtagaa<br>acccaaccg | gcgtaatacgactcac<br>tataggCCCGCG<br>GGATAGTCTGCC<br>A |

|    |     |  |  |  |                                                  |                                                 |
|----|-----|--|--|--|--------------------------------------------------|-------------------------------------------------|
| 42 | YFP |  |  |  | gcgtaatacgactcact<br>ataggcatcctggcga<br>gctggac | gcgtaatacgactcac<br>tataggcgttgggtct<br>tgctcag |
|----|-----|--|--|--|--------------------------------------------------|-------------------------------------------------|

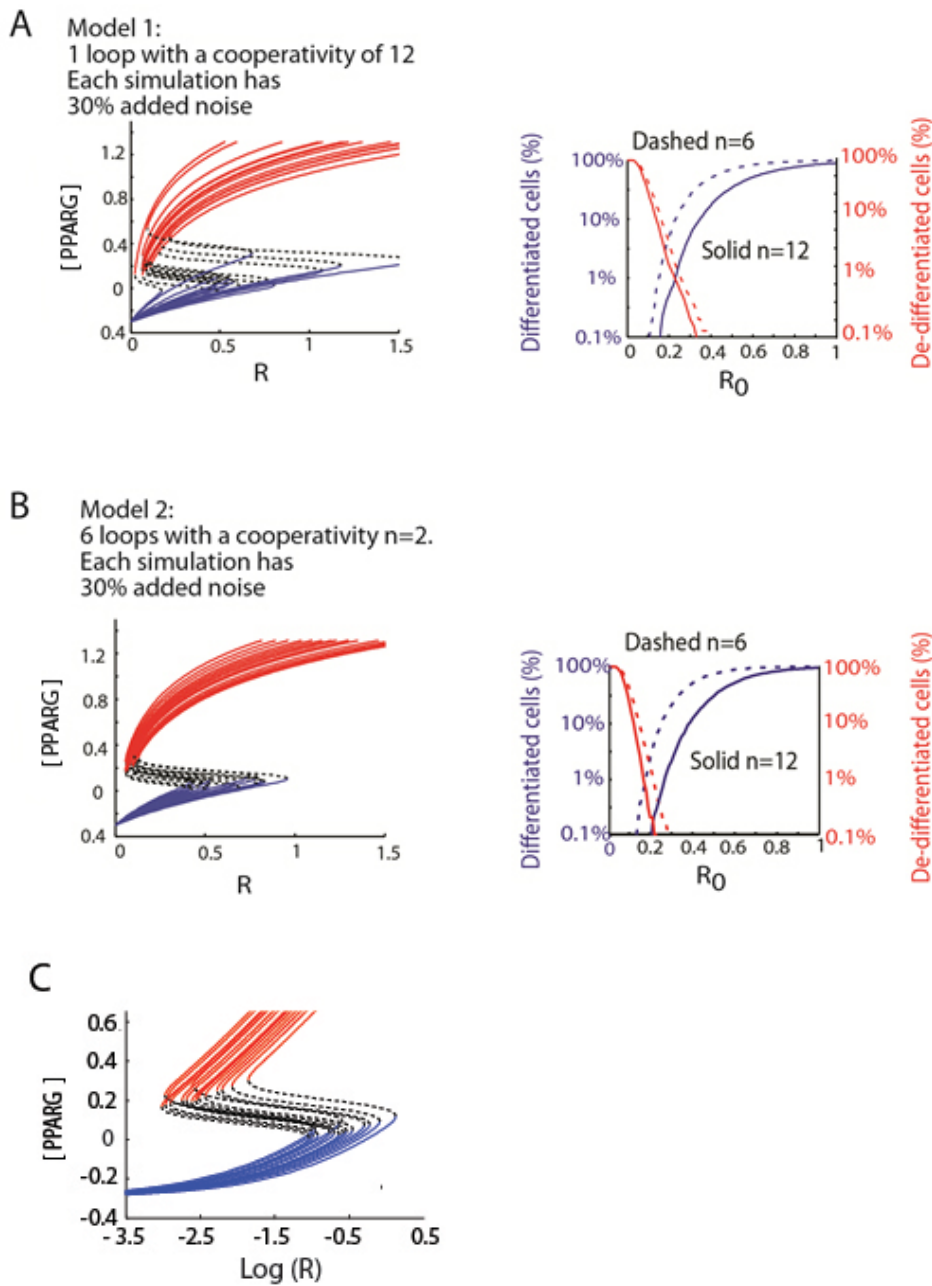

**Figure S1. Identifying the system architecture needed to both control low rates of differentiation and to prevent dedifferentiation.** (A) Increased cooperativity significantly increases the parameter variation and the ability to have graded control over small rates of differentiation. However, a single loop system (Model 1 from Fig. 2) even if it has a cooperativity of 12 still cannot solve the optimization problem. As shown in Fig. S1A (right), even if the cooperativity is increased to 12, the one-loop system requires a level of basal receptor activity,  $R$ , that needs to be both greater than 0.35 (to prevent more than 0.1% dedifferentiation) and less than 0.15 (to be able to control of the experimentally observed 0.5% rate of preadipocyte differentiation). (B) Having a multi-loop system solves the optimization problem (same Model 2 results shown in Fig. 2). The variability in  $R_{on}$  and  $R_{off}$  is actually similar for  $R_{on}$  and  $R_{off}$ , but only looks asymmetric because we are introducing lognormal noise, but are plotting  $R$  on a linear scale in Fig. S1B to better illustrate the change in PPARG values versus  $R$ . (C) Plotting the steady-state curves of Model 2 with  $R$  on log-scale shows that the variability in  $R_{on}$  and  $R_{off}$  is similar.

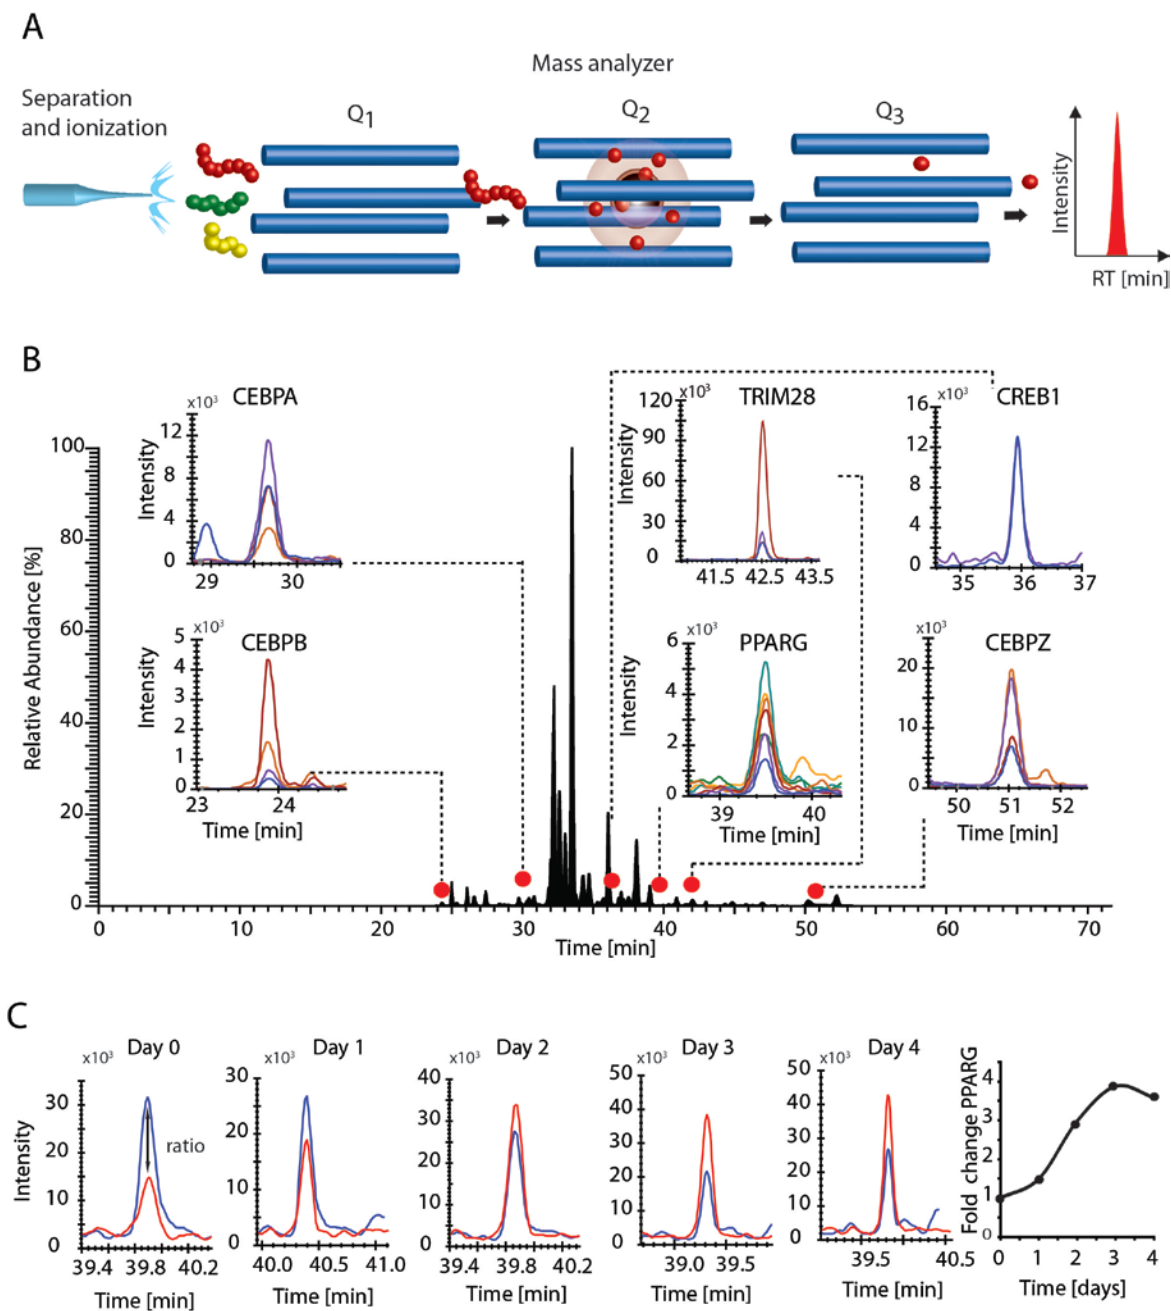

**Figure S2: Development of a method to systematically uncover feedback loops in a protein network.** A) Selective reaction monitoring (SRM) mass spectrometry-based protein quantification was carried out on a triple-quad mass spectrometer coupled to a nanoflow high pressure liquid chromatography (HPLC) separation device and nanospray ionization source. The 3 quadrupoles are marked as Q1, Q2, and Q3. The transitions (precursor/fragment ions) generated for each targeted peptide were read out by the detector as intensities over time. B) Total ion chromatogram showing measurements of 60 proteins during a 70 minute experiment on a single sample consisting of 4 $\mu$ g of total protein digest. The inset panels show chromatograms of individual monitored peptides. C) Example of how a protein is quantified over the timecourse of adipogenesis. To calculate relative changes in abundance, heavy, isotopically-labelled versions of the peptides of interest are spiked into samples at known concentration. The heavy (blue) and light, endogenous (red) peptides are measured and ratioed at the desired time points (right).



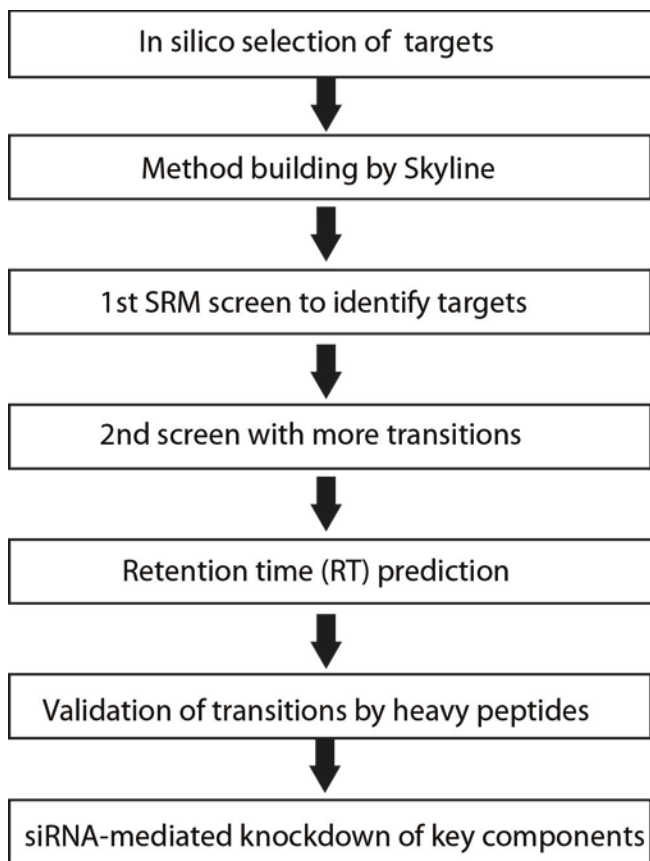

**Figure S3. Workflow for developing selective reaction monitoring (SRM) mass spectrometry assays.** We isolated nuclei from OP9 mouse cells. The trypsin-hydrolyzed fractions (days one and four) were used to screen for proteins of interest. Peptide signals with more than three transitions, a signal to noise ratio above 3, and transition signals that fell within the predicted retention time window (five minutes), were chosen for a second screen with up to 10 transitions. To validate the peptide transitions, heavy peptides were spiked into the sample as internal standards and analyzed by scheduled SRM. If the light (endogenous) peptide and the heavy (internal standard) displayed the same fragmentation pattern, retention time, and peak shape, then the peptide was selected for quantitative SRM. Targets of particular interest, e.g. proteins in feedback loops, were further validated by siRNA-mediated knockdown experiments.

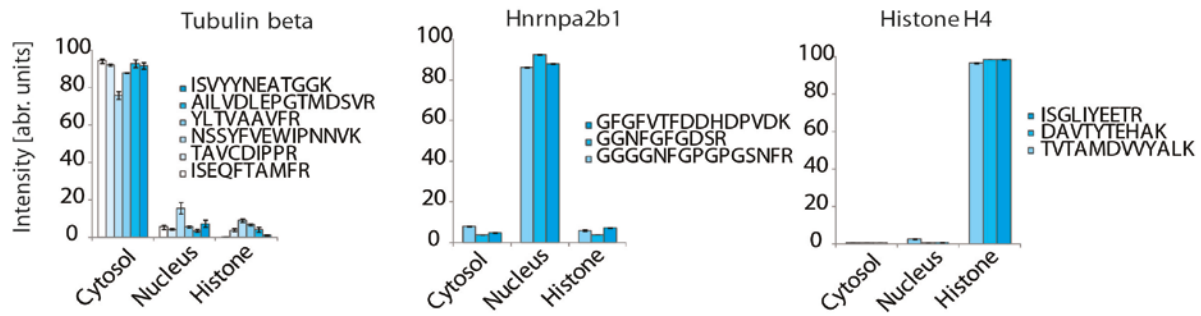

**Figure S4. Verifying the specificity of the subcellular fractionation approach.** Lysate from OP9 cells was separated into cytosolic, nuclear, and histone fractions and prepared for mass spectrometry analysis as per the protocol described in the Materials and Methods section. 3  $\mu$ g of each fraction was analyzed using SRM-MS while monitoring the following proteins in each sample: Tubulin beta-5, HNRNPA2B1 and Histone H4, representing the Cytosol, Nucleus and Histone fractions respectively. Each datapoint is the average of 3 biological replicates (error bars show standard deviation of the mean).

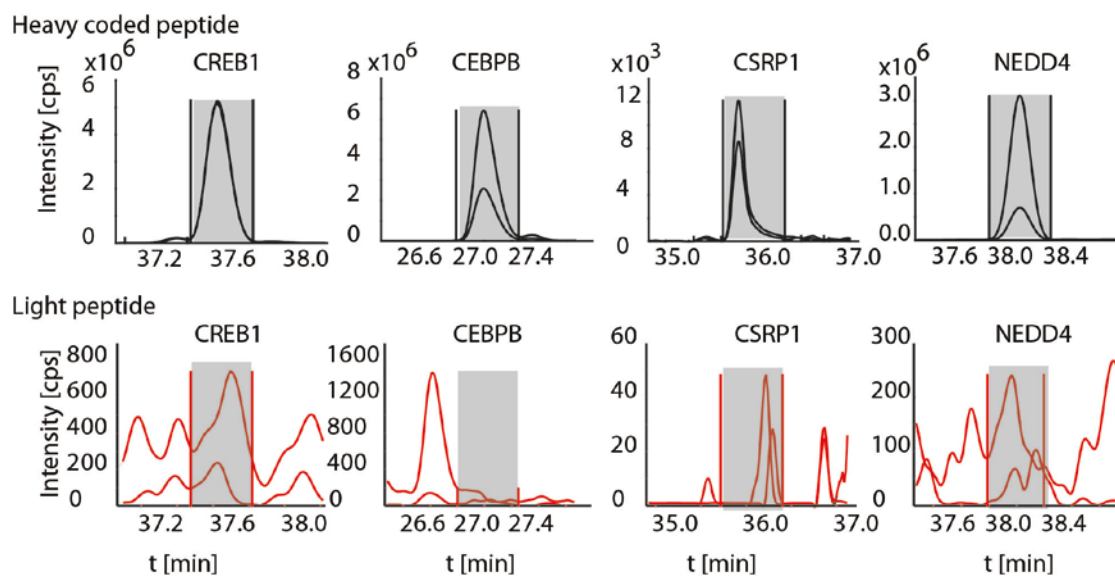

**Figure S5. Background analysis of internal standard peptides.** To measure the possible light background in our heavy peptide standard solution using SRM MS, 1 pmol of each heavy peptide was injected into the mass spectrometer, and light and heavy fragment ions were monitored simultaneously. The instrument was used in positive mode, and a spray voltage of 1500 V was applied. The SRM chromatograms display specific transitions for each peptide protein probe (heavy internal standard black and potential light contamination in red).

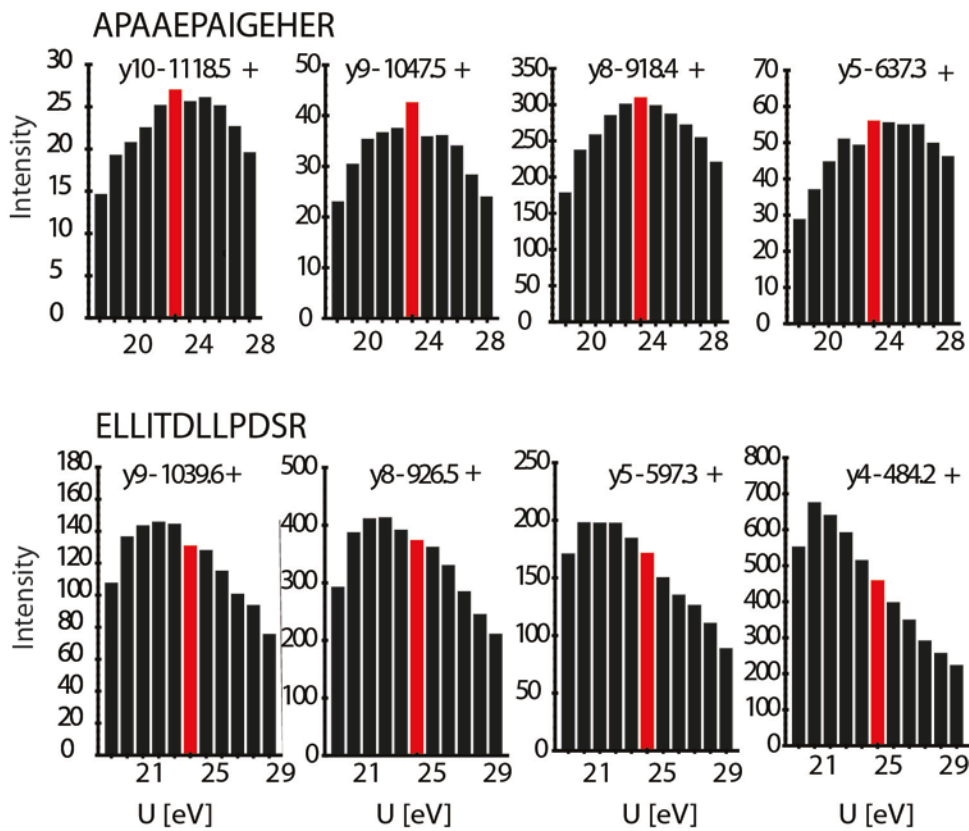

**Figure S6. Optimizing collision energy for two different peptides for C/EBPB & Z.** The heavy peptide is used to search for fragments with the best signal response and to optimize the collision energy for each transition to get the best possible signal to noise ratio on the TSQ Vantage triple-quadrupole mass spectrometer, the predicted collision energy for each peptide is marked in red.

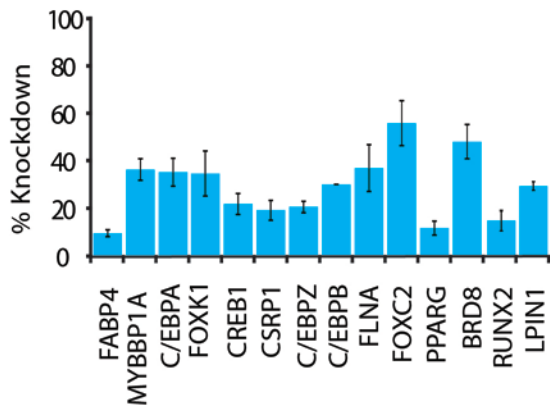

**Figure S7. Using siRNA knockdown to verify the specificity of the peptides and transitions used to measure the key proteins in this study.** OP9 cells were transfected with Lipofectamine and 20 nM of the individual diced pool siRNA 24 hours prior to the start of differentiation. Transfected mouse preadipocytes were treated by an adipogenic cocktail containing 0.517  $\mu$ M IBMX (1-methyl-3-(2-methylpropyl)-7H-purine-2,6-dione) and 60  $\mu$ M dexamethasone at the first stimulus and 172.2 nM insulin in a second stimulus over the time course of four days. The individual samples were collected and an internal standard for each monitored peptide was spiked in and the samples were measured by LC/ESI SRM MS. The obtained quantitative results were then normalized to the YFP siRNA treatment. Each datapoint is the average of 3 biological replicates (error standard deviation of the mean)

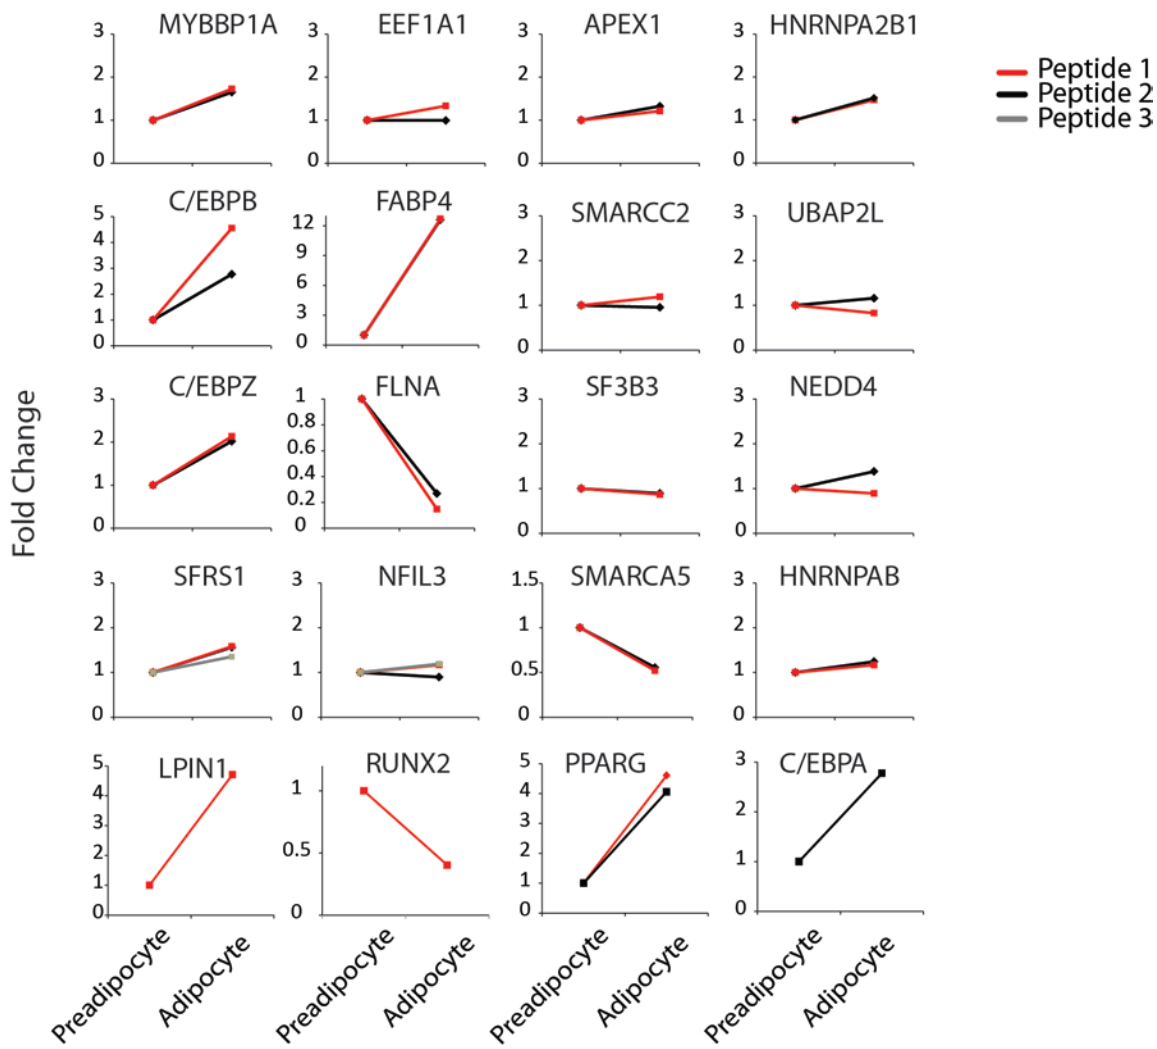

**Figure S8: Multiple peptides from the same protein display the same trend during adipogenesis.** To demonstrate that the selected peptides derived from one protein showed the same fold changes during differentiation, the fold change between the preadipocyte level and the adipocyte level was quantified. Samples were prepared from OP9 cells' nuclei extracted at different timepoints during adipogenesis. Heavy, isotopically-labeled peptides were spiked into each sample, and the samples were quantitatively analyzed using SRM mass spectrometry.

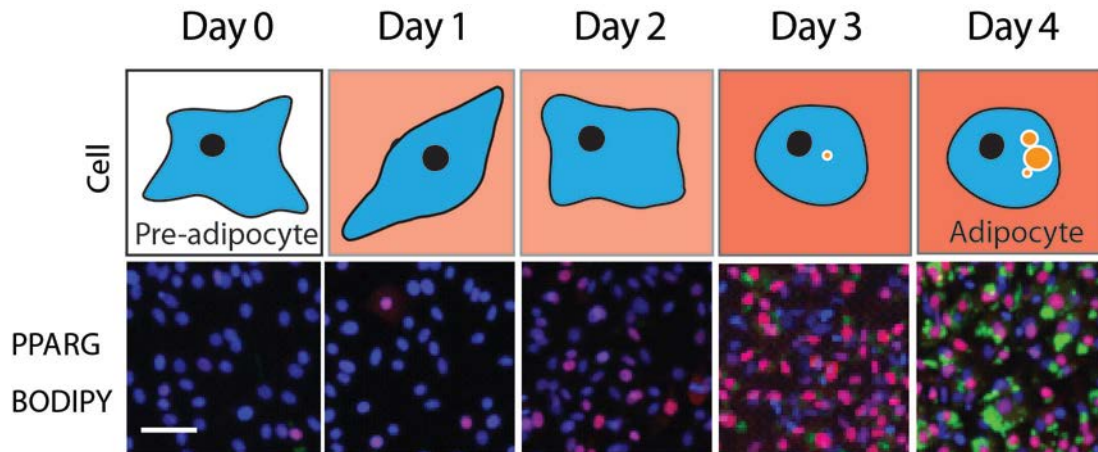

**Figure S9: Quantitating protein abundance changes over the timecourse of adipogenesis using immunocytochemistry following procedures described in Park et al (7).** A) Mouse OP9 preadipocyte cells were induced to differentiate by adding the standard adipogenic cocktail (DIM; 60  $\mu$ M dexamethasone, 0.517  $\mu$ M IBMX, and 10% FBS in MEM- $\alpha$ ) at Day 0 and then replacing it 48 hours later with MEM- $\alpha$  containing 172.2 nM insulin and 10% FBS. Differentiation was monitored by measuring expression of PPARG and lipid accumulation using single-cell fluorescence imaging. Cells were stained using a specific antibody to detect PPARG (red), BODIPY 493/503 to visualize lipid droplets (green), and DAPI to stain for nuclei (blue). Scale bar, 40  $\mu$ m.

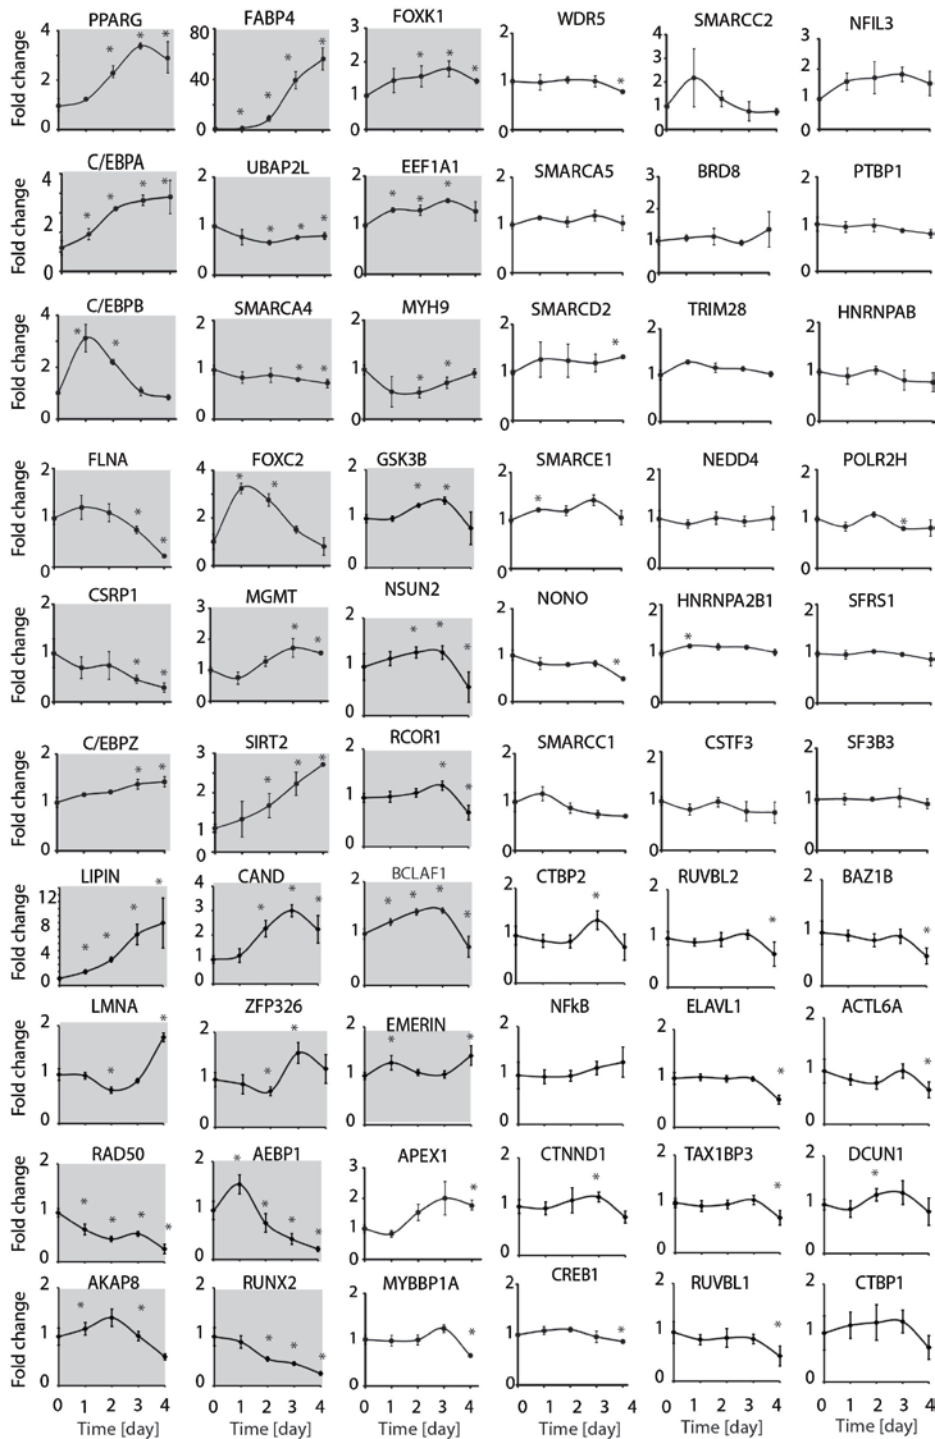

**Figure S10. Quantitating protein abundance changes over the timecourse of adipogenesis using SRM mass spectrometry.** Nuclear protein abundance changes were measured over the timecourse of adipogenesis. Each datapoint is the average of 3 biological replicates (error standard deviation of the mean). Adipogenesis was induced using DIM. Samples were prepared from nuclei extracted from OP9 cells at different timepoints during adipogenesis. Heavy, isotopically-labeled peptides were spiked into each sample, and the samples were quantitatively analyzed using SRM mass spectrometry. A protein was classified as “changing” during adipogenesis if there was a significant difference in its abundance from the Day 0 value at least at two time points during adipogenesis,  $p < 0.05$  (\*). “Changing” proteins are highlighted in grey boxes. All measurements were normalized to the values at Day 0 of the differentiation timecourse.



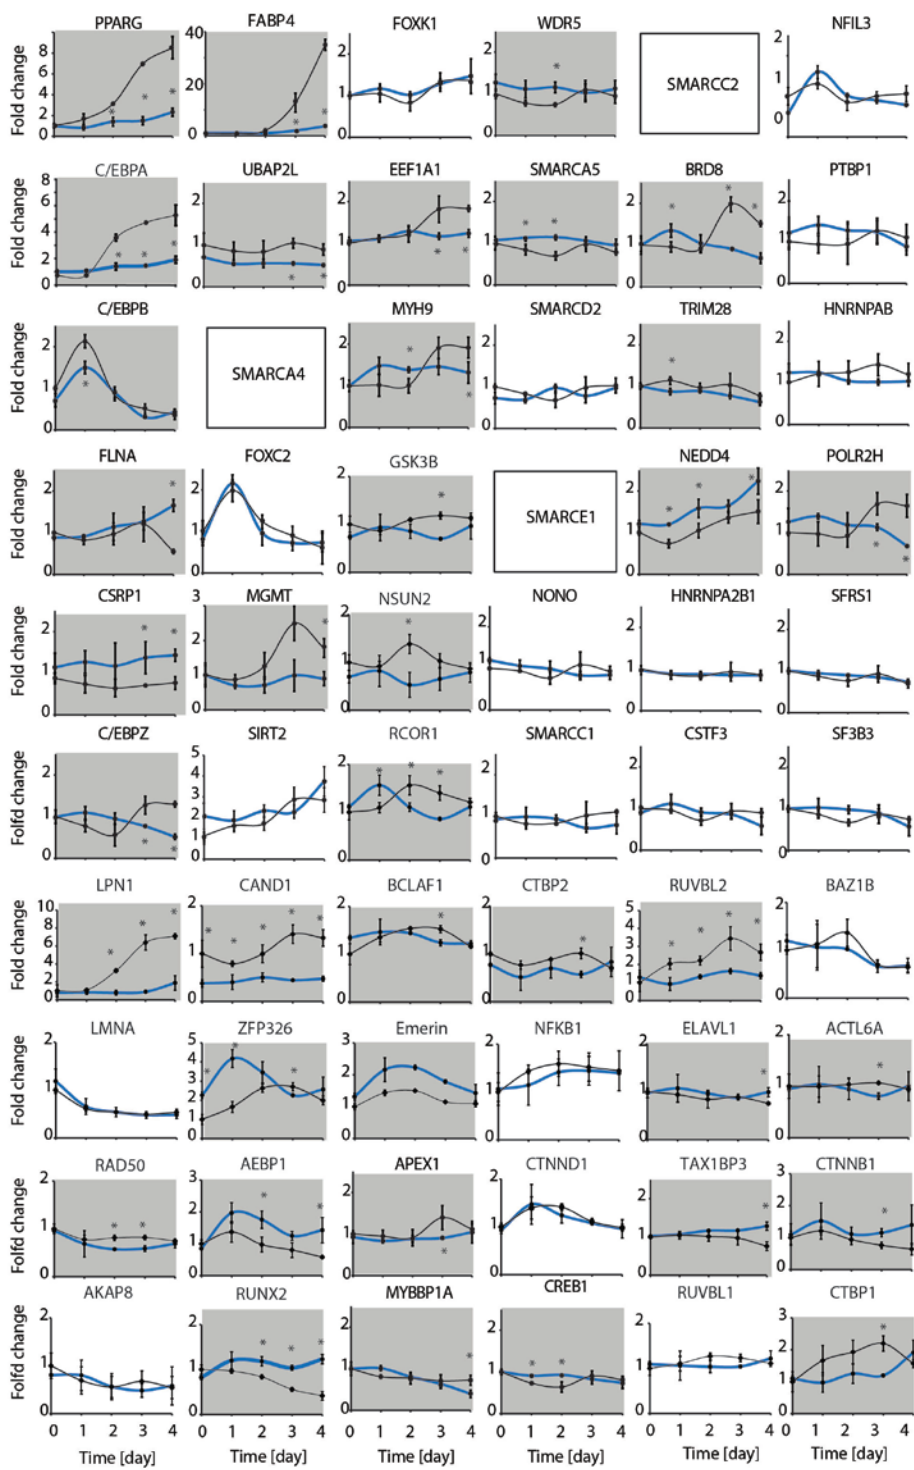

**Figure S11. Testing for PPARG-regulated proteins using siRNA-mediated knockdown of PPARG expression.** OP9 preadipocytes were transfected with siRNA targeting PPARG (blue) or YFP as a control (black) and then 24 hours later, were induced to differentiate by addition of the adipogenic cocktail. A protein was classified as influenced by the PPARG knockdown and highlighted by a grey box if its abundance in the PPARG knockdown versus control (YFP) samples varied significantly at one or more timepoints,  $p < 0.05$  (\*). “Influenced” proteins are highlighted in grey boxes. Each datapoint is the average of 3 biological replicates (error standard deviation of the mean).

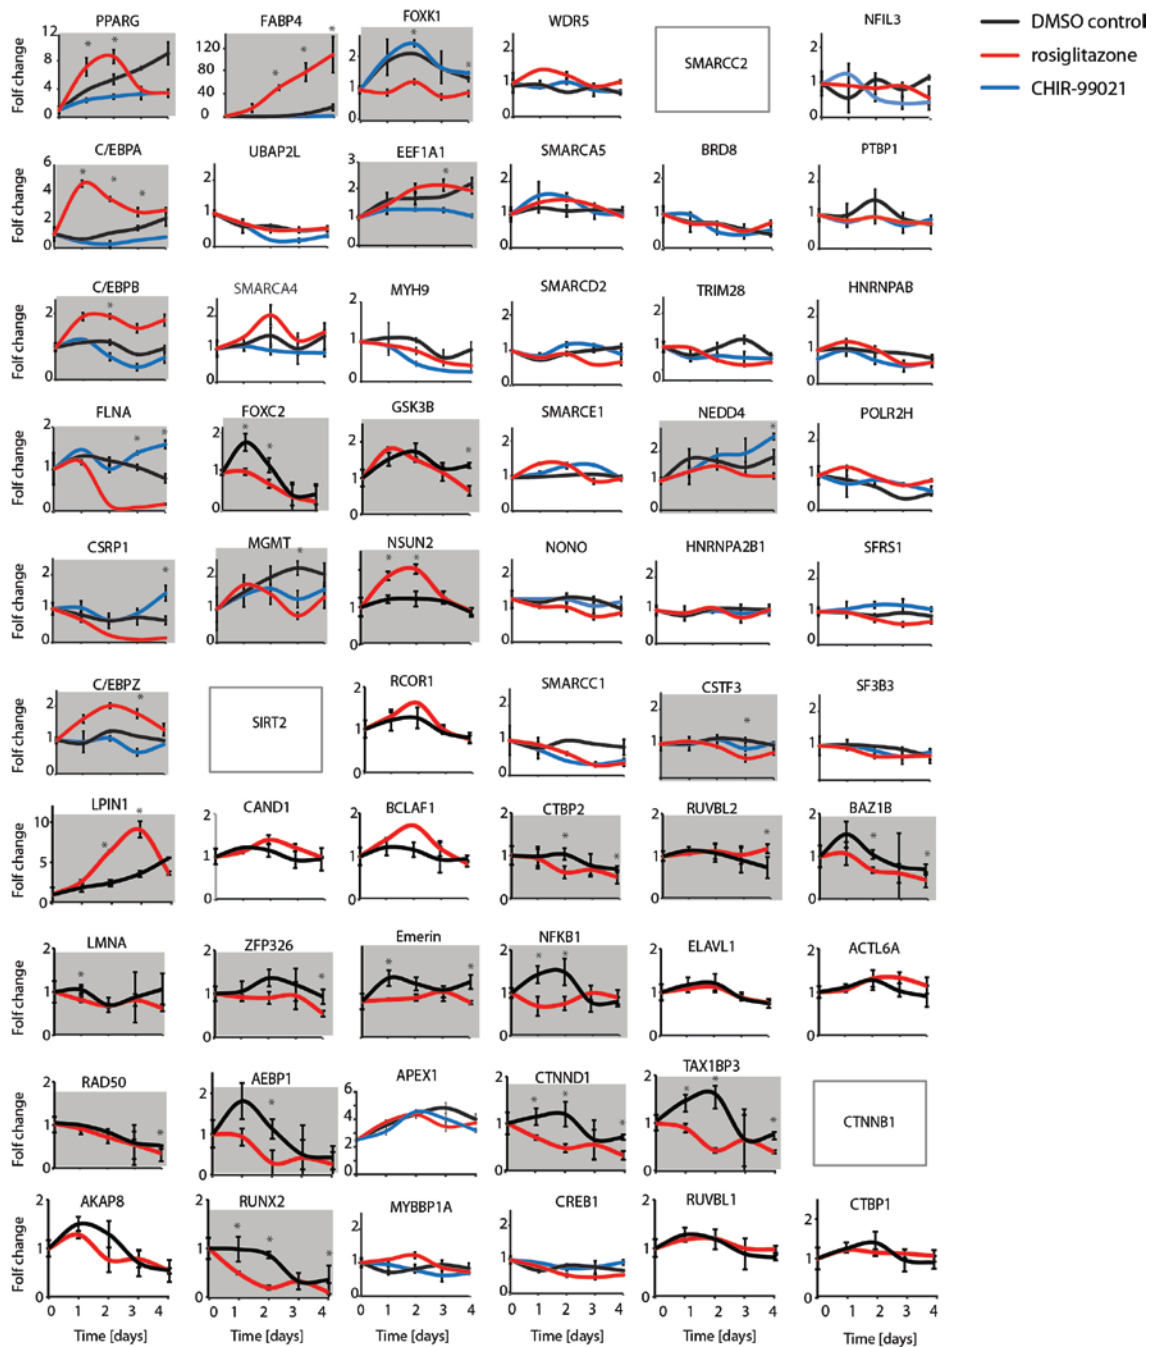

**Figure S12. Validating PPARG-regulated proteins by modulating PPARG activity using chemical perturbations.** PPARG activity was perturbed using small molecules. 10  $\mu$ M rosiglitazone (red), 0.5  $\mu$ M Chir-99021 (blue), or DMSO control (black) was added at Day 0 together with the adipogenesis-inducing stimulus (DIM). The protein was categorized as influenced by PPARG activity if it met two criteria. First, its abundance both in the PPARG-activated (rosiglitazone) sample and in the PPARG-inhibited (CHIR-99021) sample had to be significantly different from the control in at least one of the 5 time points as determined by a pairwise t-test,  $p < 0.05$  (\*). Second, PPARG activation and inhibition had to show opposite effects on the protein abundance compared to the control. Each datapoint is the average of 3 biological replicates (error standard deviation of the mean). “Influenced” proteins are highlighted in grey boxes.

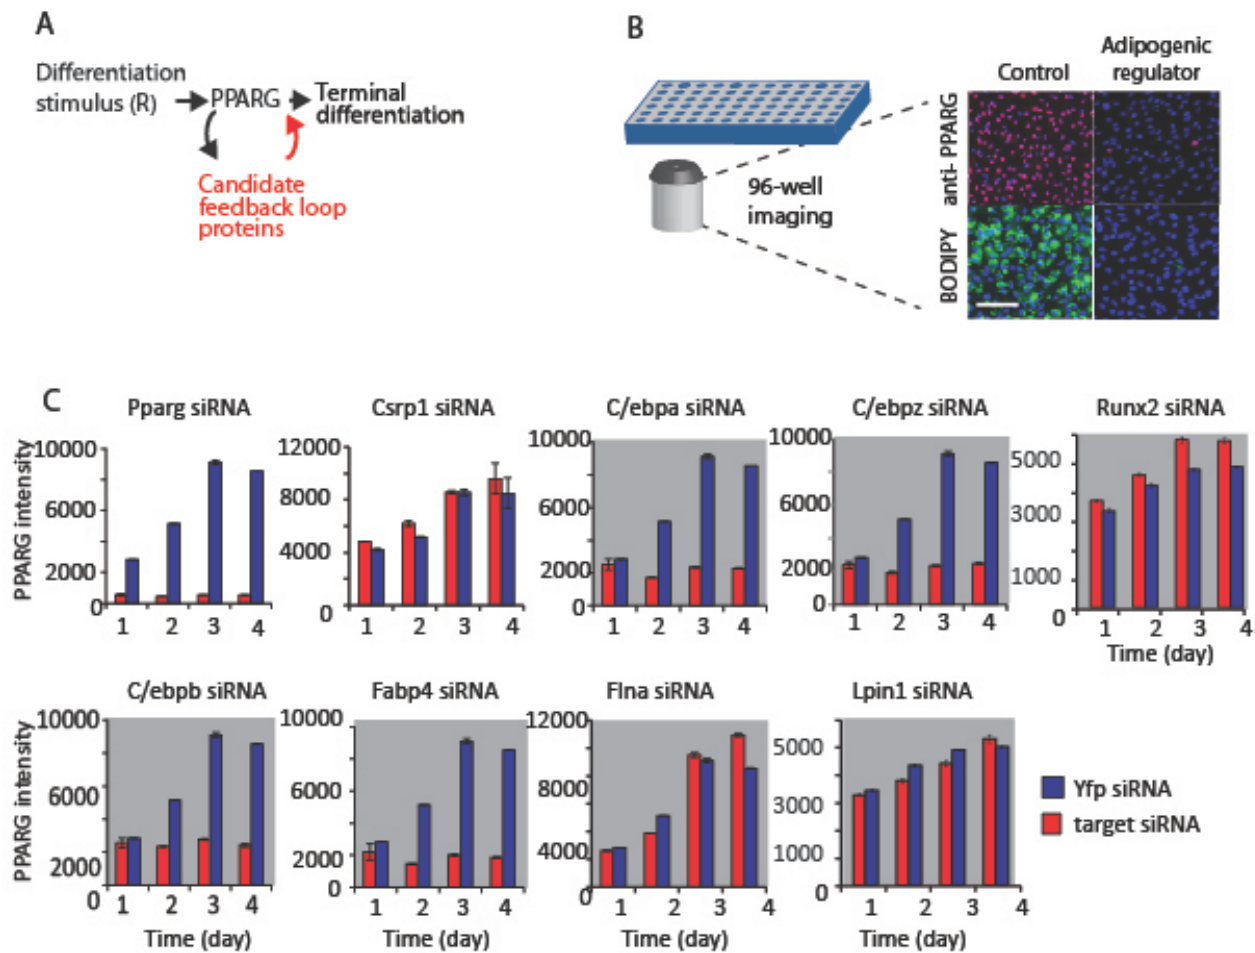

**Figure S13. Using siRNA-mediated knockdown to identify regulators of PPARG.** (A) Strategy to reveal which proteins can regulate PPARG. Direction of the applied perturbation is indicated by a red arrow. (B) Following protocols described in Park et al. (7), mouse OP9 preadipocytes were transfected with siRNA and, 24 hours later, were induced to differentiate by addition of a quarter stimulus of the adipogenic DIM cocktail. PPARG expression and lipid accumulation (BODIPY) were quantitatively measured over the timecourse of 4 days by three-color immunocytochemistry staining: PPARG (red), BODIPY (green), DAPI (blue). Images show OP9 cells at day four after induction of differentiation without (control) and with siRNA-mediated knockdown of the adipogenic regulator. Scale bar, 80  $\mu$ m. (C) Results of the immunocytochemistry staining. Each bar represents the average of approximately 10,000 individual cells. Error bars show standard deviation. Proteins found to be in feedback loops with PPARG are highlighted in grey boxes.

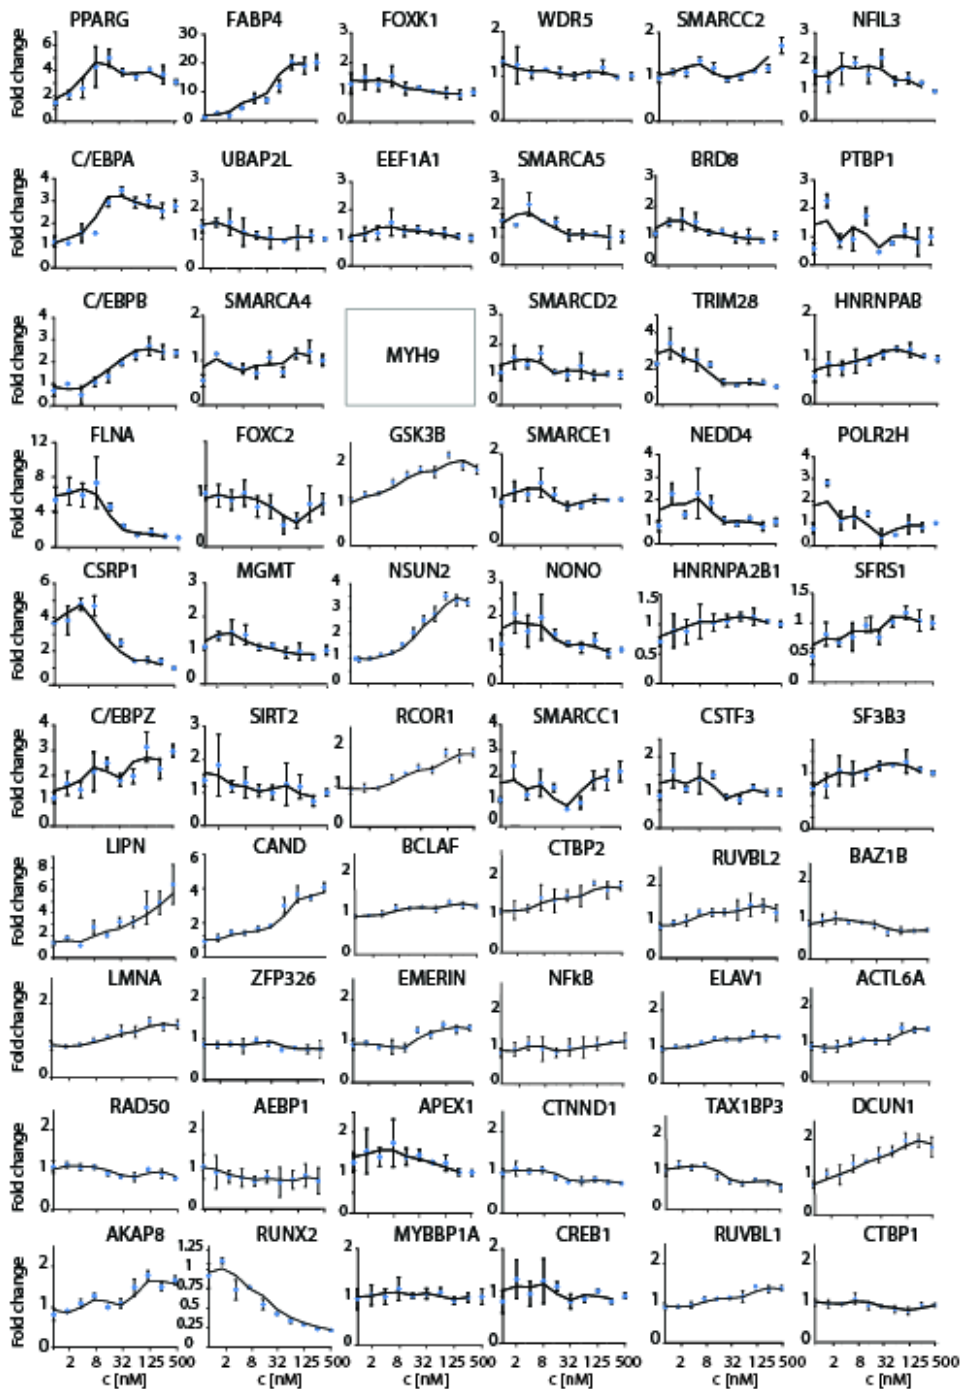

**Figure S14.** Titrating a chemical activator of PPARG to determine the relationship between PPARG activation and the abundance of the candidate proteins. The PPARG activator rosiglitazone was titrated into the media of undifferentiated OP9 cells, and the resulting protein expression levels were monitored after 48 hours, a timepoint at which all three main transcription factors (PPARG, C/EBPA and C/EBPB) were maximally expressed (7). A cooperative relationship is apparent between PPARG activity and expression of several proteins. Nuclear lysates were extracted, prepared, and analyzed by SRM mass spectrometry. Each datapoint is the average of 3 biological replicates (error standard deviation of the mean). The abundance of each time point was normalized to the concentration at the start or end point at 0 or 500 nM.

## References and Notes

1. J. Zuber, J. Shi, E. Wang, A. R. Rappaport, H. Herrmann, E. A. Sison, D. Magoon, J. Qi, K. Blatt, M. Wunderlich, M. J. Taylor, C. Johns, A. Chicas, J. C. Mulloy, S. C. Kogan, P. Brown, P. Valent, J. E. Bradner, S. W. Lowe, C. R. Vakoc, RNAi screen identifies Brd4 as a therapeutic target in acute myeloid leukaemia. *Nature* **478**, 524–528 (2011). [Medline doi:10.1038/nature10334](#)
2. Y. D. Tchoukalova, M. G. Sarr, M. D. Jensen, *Am. J. Physiol.* **287**, R1132 (2004).
3. A. Chawla, E. J. Schwarz, D. D. Dimaculangan, M. A. Lazar, Peroxisome proliferator-activated receptor (PPAR) gamma: Adipose-predominant expression and induction early in adipocyte differentiation. *Endocrinology* **135**, 798–800 (1994). [Medline](#)
4. E. D. Rosen, C. H. Hsu, X. Wang, S. Sakai, M. W. Freeman, F. J. Gonzalez, B. M. Spiegelman, C/EBPalpha induces adipogenesis through PPARgamma: A unified pathway. *Genes Dev.* **16**, 22–26 (2002). [Medline doi:10.1101/gad.948702](#)
5. K. L. Spalding, E. Arner, P. O. Westermark, S. Bernard, B. A. Buchholz, O. Bergmann, L. Blomqvist, J. Hoffstedt, E. Näslund, T. Britton, H. Concha, M. Hassan, M. Rydén, J. Frisén, P. Arner, Dynamics of fat cell turnover in humans. *Nature* **453**, 783–787 (2008). [Medline doi:10.1038/nature06902](#)
6. G. M. Süel, R. P. Kulkarni, J. Dworkin, J. Garcia-Ojalvo, M. B. Elowitz, Tunability and noise dependence in differentiation dynamics. *Science* **315**, 1716–1719 (2007). [Medline doi:10.1126/science.1137455](#)
7. B. O. Park, R. Ahrends, M. N. Teruel, Consecutive positive feedback loops create a bistable switch that controls preadipocyte-to-adipocyte conversion. *Cell Reports* **2**, 976–990 (2012). [Medline doi:10.1016/j.celrep.2012.08.038](#)
8. H. H. Chang, M. Hemberg, M. Barahona, D. E. Ingber, S. Huang, Transcriptome-wide noise controls lineage choice in mammalian progenitor cells. *Nature* **453**, 544–547 (2008). [Medline doi:10.1038/nature06965](#)
9. J. Hanna, K. Saha, B. Pando, J. van Zon, C. J. Lengner, M. P. Creighton, A. van Oudenaarden, R. Jaenisch, Direct cell reprogramming is a stochastic process amenable to acceleration. *Nature* **462**, 595–601 (2009). [Medline doi:10.1038/nature08592](#)
10. S. Palani, C. A. Sarkar, Transient noise amplification and gene expression synchronization in a bistable mammalian cell-fate switch. *Cell Reports* **1**, 215–224 (2012). [Medline doi:10.1016/j.celrep.2012.01.007](#)
11. A. Poloni, G. Maurizi, P. Leoni, F. Serrani, S. Mancini, A. Frontini, M. C. Zingaretti, W. Siquini, R. Sarzani, S. Cinti, Human dedifferentiated adipocytes show similar properties to bone marrow-derived mesenchymal stem cells. *Stem Cells* **30**, 965–974 (2012). [Medline doi:10.1002/stem.1067](#)
12. C. Talchai, S. Xuan, H. V. Lin, L. Sussel, D. Accili, Pancreatic  $\beta$  cell dedifferentiation as a mechanism of diabetic  $\beta$  cell failure. *Cell* **150**, 1223–1234 (2012). [Medline doi:10.1016/j.cell.2012.07.029](#)

13. T. Reiff, K. Tsarovina, A. Majdzari, M. Schmidt, I. del Pino, H. Rohrer, Neuroblastoma phox2b variants stimulate proliferation and dedifferentiation of immature sympathetic neurons. *J. Neurosci.* **30**, 905–915 (2010). [Medline](#)  
[doi:10.1523/JNEUROSCI.5368-09.2010](https://doi.org/10.1523/JNEUROSCI.5368-09.2010)
14. P. R. Tata, H. Mou, A. Pardo-Saganta, R. Zhao, M. Prabhu, B. M. Law, V. Vinarsky, J. L. Cho, S. Breton, A. Sahay, B. D. Medoff, J. Rajagopal, Dedifferentiation of committed epithelial cells into stem cells in vivo. *Nature* **503**, 218–223 (2013).  
[Medline](#)
15. S. E. Senyo, M. L. Steinhauser, C. L. Pizzimenti, V. K. Yang, L. Cai, M. Wang, T. D. Wu, J. L. Guerquin-Kern, C. P. Lechene, R. T. Lee, Mammalian heart renewal by pre-existing cardiomyocytes. *Nature* **493**, 433–436 (2013). [Medline](#)  
[doi:10.1038/nature11682](https://doi.org/10.1038/nature11682)
16. M. Niepel, S. L. Spencer, P. K. Sorger, Non-genetic cell-to-cell variability and the consequences for pharmacology. *Curr. Opin. Chem. Biol.* **13**, 556–561 (2009).  
[Medline](#) [doi:10.1016/j.cbpa.2009.09.015](https://doi.org/10.1016/j.cbpa.2009.09.015)
17. Q. A. Wang, C. Tao, R. K. Gupta, P. E. Scherer, Tracking adipogenesis during white adipose tissue development, expansion and regeneration. *Nat. Med.* **19**, 1338–1344 (2013). [Medline](#) [doi:10.1038/nm.3324](https://doi.org/10.1038/nm.3324)
18. N. B. Trunnell, A. C. Poon, S. Y. Kim, J. E. Ferrell Jr., Ultrasensitivity in the Regulation of Cdc25C by Cdk1. *Mol. Cell* **41**, 263–274 (2011). [Medline](#)  
[doi:10.1016/j.molcel.2011.01.012](https://doi.org/10.1016/j.molcel.2011.01.012)
19. O. Brandman, J. E. Ferrell Jr., R. Li, T. Meyer, Interlinked fast and slow positive feedback loops drive reliable cell decisions. *Science* **310**, 496–498 (2005).
20. E. D. Rosen, O. A. MacDougald, Adipocyte differentiation from the inside out. *Nat. Rev. Mol. Cell Biol.* **7**, 885–896 (2006). [Medline](#) [doi:10.1038/nrm2066](https://doi.org/10.1038/nrm2066)
21. R. Berry, E. Jeffery, M. S. Rodeheffer, Weighing in on adipocyte precursors. *Cell Metab.* **19**, 8–20 (2014).
22. D. C. Berry, D. Stenesen, D. Zeve, J. M. Graff, The developmental origins of adipose tissue. *Development* **140**, 3939–3949 (2013). [Medline](#) [doi:10.1242/dev.080549](https://doi.org/10.1242/dev.080549)
23. N. E. Wolins, B. K. Quaynor, J. R. Skinner, A. Tzekov, C. Park, K. Choi, P. E. Bickel, OP9 mouse stromal cells rapidly differentiate into adipocytes: Characterization of a useful new model of adipogenesis. *J. Lipid Res.* **47**, 450–460 (2006). [Medline](#) [doi:10.1194/jlr.D500037-JLR200](https://doi.org/10.1194/jlr.D500037-JLR200)
24. E. Abell, R. Ahrends, S. Bandara, B. O. Park, M. N. Teruel, Parallel adaptive feedback enhances reliability of the Ca<sup>2+</sup> signaling system. *Proc. Natl. Acad. Sci. U.S.A.* **108**, 14485–14490 (2011). [Medline](#) [doi:10.1073/pnas.1018266108](https://doi.org/10.1073/pnas.1018266108)
25. P. Picotti, B. Bodenmiller, L. N. Mueller, B. Domon, R. Aebersold, Full dynamic range proteome analysis of *S. cerevisiae* by targeted proteomics. *Cell* **138**, 795–806 (2009). [Medline](#) [doi:10.1016/j.cell.2009.05.051](https://doi.org/10.1016/j.cell.2009.05.051)
26. M. I. Lefterova, Y. Zhang, D. J. Steger, M. Schupp, J. Schug, A. Cristancho, D. Feng, D. Zhuo, C. J. Stoeckert Jr., X. S. Liu, M. A. Lazar, PPAR $\gamma$  and C/EBP factors

- orchestrate adipocyte biology via adjacent binding on a genome-wide scale. *Genes Dev.* **22**, 2941–2952 (2008). [Medline doi:10.1101/gad.1709008](#)
27. S. D. Ayers, K. L. Nedrow, R. E. Gillilan, N. Noy, Continuous nucleocytoplasmic shuttling underlies transcriptional activation of PPAR $\gamma$  by FABP4. *Biochemistry* **46**, 6744–6752 (2007). [Medline doi:10.1021/bi700047a](#)
28. H. E. Kim, E. Bae, D. Y. Jeong, M. J. Kim, W. J. Jin, S. W. Park, G. S. Han, G. M. Carman, E. Koh, K. S. Kim, Lipin1 regulates PPAR $\gamma$  transcriptional activity. *Biochem. J.* **453**, 49–60 (2013). [Medline doi:10.1042/BJ20121598](#)
29. P. Tontonoz, B. M. Spiegelman, Fat and beyond: The diverse biology of PPAR $\gamma$ . *Annu. Rev. Biochem.* **77**, 289–312 (2008). [Medline doi:10.1146/annurev.biochem.77.061307.091829](#)
30. T. Galvez, M. N. Teruel, W. D. Heo, J. T. Jones, M. L. Kim, J. Liou, J. W. Myers, T. Meyer, siRNA screen of the human signaling proteome identifies the PtdIns(3,4,5)P3-mTOR signaling pathway as a primary regulator of transferrin uptake. *Genome Biol.* **8**, R142 (2007). [Medline doi:10.1186/gb-2007-8-7-r142](#)
31. J. R. Taylor, *An Introduction to Error Analysis: The Study of Uncertainties in Physical Measurements* (University Science, Sausalito, CA, ed. 2, 1997).
